# Supplementary material
Source: PubMed Central journal article supplement (PMC6660733)
Supplement: pnas.1901307116.sapp.pdf [file pnas.1901307116.sapp.pdf]

## **Supplemental Materials and Methods**

### ***Site monitoring and characterization of environmental indices***

Thaw depth was measured using a metal depth probe. Constantan–copper thermocouples and CR1000 data loggers (Campbell Scientific) were used to measure and record soil temperature and moisture content at each depth every half hour in flux bases installed in each plot. Volumetric water content from the soil surface to 15 cm depth was measured using site-calibrated Campbell CS616 water content reflectometer probes and soil moisture data presented in this study were averaged over the growing season. To prepare soils for microbial and chemical analyses, visible roots and stones were removed by metal forceps. To measure soil C and nitrogen (N), soil samples (5 g) were dried at 70 °C, ground to powder, encapsulated in silver foil and fumigated with HCl for 24 h at room temperature to remove soil inorganic C (carbonates). Soil C and N concentrations were analyzed in the Colorado Plateau Stable Isotope Laboratory at the Northern Arizona University on a DELTA V Advantage isotope ratio mass spectrometer (Thermo Fisher Scientific), configured through a Finnigan CONFLO III (Thermo Fisher Scientific) and using a Carlo Erba NC2100 elemental analyser (CE Elantech).

### ***Soil DNA isolation, metagenome library preparation, and sequencing***

Soil DNA was extracted using a freeze-grinding plus sodium dodecyl sulfate (SDS) lysis method as described previously [1] and was purified by a MOBIO PowerSoil kit (MO BIO Laboratories, Inc., Carlsbad, CA, USA) according to manufacturer's protocol. DNA quality was assessed based on spectrometry absorbance at wavelengths of 230nm, 260nm and 280nm detected by a NanoDrop ND-1000 Spectrophotometer (NanoDrop Products by Thermo Fisher Scientific). The absorbance ratios of 260/280 nm were around 1.8, and of 260/230 nm were larger than 1.7. The final DNA concentrations were quantified by PicoGreen

using a FLUOstar Optima fluorescence plate reader (BMG Labtech, Jena, Germany). Dual-indexed DNA sequencing libraries were prepared using the Illumina Nextera XT DNA library prep kit according to manufacturer's instruction except that the protocol was terminated after isolation of cleaned double-stranded libraries. Prepared library DNA concentrations were determined with a Qubit HS DNA assay and libraries were run on a High Sensitivity DNA chip using the Bioanalyzer 2100 instrument (Agilent) to determine library average insert sizes. DNA libraries were sequenced at the Georgia Institute of Technology High Throughput DNA Sequencing Core on an Illumina HiSeq 2500 instrument in the rapid run mode for 300 cycles (150 bp, paired-end mode). Adapter trimming and demultiplexing of sequences (assignment of sequences to samples) were carried out by the Illumina 2500 instrument. Metagenomic sequences have been deposited in the European Nucleotide Archive.

[1] Zhou JZ, Bruns MA, and Tiedje JM (1996) DNA recovery from soils of diverse composition. *Applied and Environmental Microbiology* 2: 316-322.

## Supplemental tables

**Table S1: European Nucleotide Archive database accession IDs, sequencing depth, quality metrics, and average genome size for all twenty-four soil community metagenomes from the 4.5-year CiPEHR sample collection (May 2013).** Estimated average genome size of each sample community metagenome was determined with MicrobeCensus. MicrobeCensus (Nayfach and Pollard 2015) is a tool that estimates average genome size by normalizing the number of reads matching to a set of conserved single copy marker genes by the total number of reads used in query.

| Sample metagenome          | ENA Sample ID | # Raw sequences | # Post-QC sequences | % Reads retained | Raw data size (Gbp) | Data size post-QC (Gbp) | Est. avg genome size |
|----------------------------|---------------|-----------------|---------------------|------------------|---------------------|-------------------------|----------------------|
| Fence 1, 15-25 cm, Control | ERS3336394    | 16921626        | 14009649            | 82.80%           | 5.08                | 3.02                    | 6929393              |
| Fence 2, 15-25 cm, Control | ERS3336395    | 27732641        | 22464651            | 81.00%           | 8.32                | 5.56                    | 6699766              |
| Fence 3, 15-25 cm, Control | ERS3336396    | 23357438        | 18245350            | 78.10%           | 7.01                | 4.79                    | 6345230              |
| Fence 4, 15-25 cm, Control | ERS3336397    | 28854107        | 20482564            | 71.00%           | 8.66                | 5.65                    | 6288559              |
| Fence 5, 15-25 cm, Control | ERS3336398    | 37835617        | 30044541            | 79.40%           | 11.35               | 6.35                    | 6130808              |
| Fence 6, 15-25 cm, Control | ERS3336399    | 21182813        | 15933022            | 75.20%           | 6.35                | 4.26                    | 7500976              |
| Fence 1, 15-25 cm, Warming | ERS3336400    | 24473078        | 19649679            | 80.30%           | 7.34                | 4.94                    | 6806590              |
| Fence 2, 15-25 cm, Warming | ERS3336401    | 29401318        | 24324617            | 82.70%           | 8.82                | 5.99                    | 6327260              |
| Fence 3, 15-25 cm, Warming | ERS3336402    | 31374460        | 22870499            | 72.90%           | 9.41                | 6.08                    | 7035674              |
| Fence 4, 15-25 cm, Warming | ERS3336403    | 20149558        | 15834600            | 78.60%           | 6.04                | 4.07                    | 7438793              |
| Fence 5, 15-25 cm, Warming | ERS3336404    | 23412481        | 18608517            | 79.50%           | 7.02                | 4.56                    | 7009593              |
| Fence 6, 15-25 cm, Warming | ERS3336405    | 38005737        | 31682650            | 83.40%           | 11.4                | 6.93                    | 5873189              |
| Fence 1, 45-55 cm, Control | ERS3336406    | 14057671        | 11455841            | 81.50%           | 4.22                | 2.88                    | 4794725              |
| Fence 2, 45-55 cm, Control | ERS3336407    | 20247622        | 16323195            | 80.60%           | 6.07                | 3.58                    | 4785026              |
| Fence 3, 45-55 cm, Control | ERS3336408    | 18636844        | 15863933            | 85.10%           | 5.59                | 3.78                    | 5129050              |
| Fence 4, 45-55 cm, Control | ERS3336409    | 18322419        | 15359809            | 83.80%           | 5.5                 | 3.56                    | 5186224              |
| Fence 5, 45-55 cm, Control | ERS3336410    | 15207692        | 12794505            | 84.10%           | 4.56                | 3.22                    | 5014540              |
| Fence 6, 45-55 cm, Control | ERS3336411    | 19174175        | 16153340            | 84.20%           | 5.75                | 3.73                    | 4131485              |
| Fence 1, 45-55 cm, Warming | ERS3336412    | 24867267        | 20116318            | 80.90%           | 7.46                | 4.09                    | 4248245              |
| Fence 2, 45-55 cm, Warming | ERS3336413    | 26240894        | 20213517            | 77.00%           | 7.87                | 3.81                    | 4162469              |
| Fence 3, 45-55 cm, Warming | ERS3336414    | 22183927        | 18370879            | 82.80%           | 6.66                | 4                       | 4878232              |
| Fence 4, 45-55 cm, Warming | ERS3336415    | 19747772        | 16796376            | 85.10%           | 5.92                | 3.95                    | 4282672              |
| Fence 5, 45-55 cm, Warming | ERS3336416    | 12737442        | 10115066            | 79.40%           | 3.82                | 2.48                    | 4954275              |
| Fence 6, 45-55 cm, Warming | ERS3336417    | 18580029        | 15219345            | 81.90%           | 5.57                | 3.36                    | 4799293              |

**Table S2: The relative sequence abundances of archaeal clades in 4.5-year metagenomes.** Percentages represent the proportion of metagenome-derived 16S sequences matching to each clade relative to the number of total bacterial and archaeal 16S sequences (i.e., proportion relative to total prokaryotic community).

| Sample metagenome ID       | Total Archaea | Cren-archaeota | Diapherotrites | Eury-archaeota | Nano-archaeaeota | Thaum-archaeota | Methanoperedens |
|----------------------------|---------------|----------------|----------------|----------------|------------------|-----------------|-----------------|
| Fence 1, 15-25 cm, control | 1.687%        | 0.337%         | 0.000%         | 0.844%         | 0.000%           | 0.506%          | 0.000%          |
| Fence 2, 15-25 cm, control | 1.337%        | 0.000%         | 0.122%         | 0.243%         | 0.000%           | 0.972%          | 0.000%          |
| Fence 3, 15-25 cm, control | 1.600%        | 0.123%         | 0.000%         | 0.246%         | 0.000%           | 1.231%          | 0.000%          |
| Fence 4, 15-25 cm, control | 1.581%        | 0.063%         | 0.063%         | 0.316%         | 0.000%           | 1.138%          | 0.000%          |
| Fence 5, 15-25 cm, control | 2.005%        | 0.143%         | 0.191%         | 1.146%         | 0.000%           | 0.525%          | 0.000%          |
| Fence 6, 15-25 cm, control | 2.224%        | 0.000%         | 0.035%         | 0.000%         | 0.000%           | 2.189%          | 0.000%          |
| Fence 1, 15-25 cm, warmed  | 1.738%        | 0.000%         | 0.087%         | 0.087%         | 0.087%           | 1.478%          | 0.000%          |
| Fence 2, 15-25 cm, warmed  | 1.062%        | 0.000%         | 0.118%         | 0.000%         | 0.000%           | 0.944%          | 0.000%          |
| Fence 3, 15-25 cm, warmed  | 1.626%        | 0.296%         | 0.000%         | 0.444%         | 0.000%           | 0.887%          | 0.000%          |
| Fence 4, 15-25 cm, warmed  | 1.759%        | 0.000%         | 0.065%         | 0.000%         | 0.000%           | 1.694%          | 0.000%          |
| Fence 5, 15-25 cm, warmed  | 1.831%        | 0.000%         | 0.000%         | 0.354%         | 0.000%           | 1.476%          | 0.000%          |
| Fence 6, 15-25 cm, warmed  | 1.839%        | 0.225%         | 0.000%         | 1.389%         | 0.000%           | 0.225%          | 0.000%          |
| Fence 1, 45-55 cm, control | 1.883%        | 0.583%         | 0.053%         | 1.087%         | 0.000%           | 0.159%          | 0.505%          |
| Fence 2, 45-55 cm, control | 1.552%        | 0.038%         | 0.000%         | 1.514%         | 0.000%           | 0.000%          | 0.153%          |
| Fence 3, 45-55 cm, control | 1.655%        | 0.061%         | 0.000%         | 1.318%         | 0.000%           | 0.276%          | 0.000%          |
| Fence 4, 45-55 cm, control | 2.888%        | 0.380%         | 0.000%         | 2.507%         | 0.000%           | 0.000%          | 0.000%          |
| Fence 5, 45-55 cm, control | 2.761%        | 0.194%         | 0.000%         | 2.527%         | 0.000%           | 0.039%          | 0.000%          |
| Fence 6, 45-55 cm, control | 2.503%        | 0.000%         | 0.054%         | 2.448%         | 0.000%           | 0.000%          | 0.381%          |
| Fence 1, 45-55 cm, warmed  | 4.189%        | 0.313%         | 0.030%         | 3.816%         | 0.015%           | 0.015%          | 3.026%          |
| Fence 2, 45-55 cm, warmed  | 3.456%        | 0.377%         | 0.000%         | 3.063%         | 0.016%           | 0.000%          | 1.753%          |
| Fence 3, 45-55 cm, warmed  | 2.604%        | 0.133%         | 0.019%         | 2.395%         | 0.038%           | 0.019%          | 0.000%          |
| Fence 4, 45-55 cm, warmed  | 3.021%        | 0.407%         | 0.086%         | 2.529%         | 0.000%           | 0.000%          | 0.021%          |
| Fence 5, 45-55 cm, warmed  | 2.716%        | 0.157%         | 0.079%         | 2.440%         | 0.000%           | 0.039%          | 0.118%          |
| Fence 6, 45-55 cm, warmed  | 2.422%        | 0.153%         | 0.092%         | 2.115%         | 0.061%           | 0.000%          | 0.276%          |

**Table S3: Metagenome-assembled genome (MAG) quality indicators and basic genome statistics.** MAG completeness and contamination was determined using CheckM lineage workflow for either domain *Archaea* or *Bacteria*.

| MAG ID              | Source metagenome          | CheckM lineage | Completeness | Contamination | Quality score | Genome size (bp) | # contigs |
|---------------------|----------------------------|----------------|--------------|---------------|---------------|------------------|-----------|
| AK5YR.2.maxbin2.1   | Fence 2, 15-25 cm, Control | Bacteria       | 84.95        | 2.74          | 71.25         | 6931655          | 809       |
| AK5YR.2.maxbin2.12  | Fence 2, 15-25 cm, Control | Bacteria       | 98.82        | 3.79          | 79.87         | 6459283          | 720       |
| AK5YR.2.maxbin2.7   | Fence 2, 15-25 cm, Control | Bacteria       | 78.45        | 1.72          | 69.85         | 2238819          | 480       |
| AK5YR.2.metabat2.12 | Fence 2, 15-25 cm, Control | Bacteria       | 82.41        | 1.72          | 73.81         | 2643895          | 488       |
| AK5YR.2.metabat2.14 | Fence 2, 15-25 cm, Control | Bacteria       | 100          | 4.31          | 78.45         | 3869809          | 450       |
| AK5YR.2.metabat2.17 | Fence 2, 15-25 cm, Control | Bacteria       | 63.34        | 0.16          | 62.54         | 2733095          | 601       |
| AK5YR.2.metabat2.25 | Fence 2, 15-25 cm, Control | Bacteria       | 84.09        | 3.03          | 68.94         | 7008488          | 1210      |
| AK5YR.2.metabat2.9  | Fence 2, 15-25 cm, Control | Bacteria       | 84.72        | 0             | 84.72         | 4096575          | 646       |
| AK5YR.3.maxbin2.1   | Fence 3, 15-25 cm, Control | Bacteria       | 81.27        | 1.72          | 72.67         | 6764200          | 1117      |
| AK5YR.3.maxbin2.10  | Fence 3, 15-25 cm, Control | Bacteria       | 63.17        | 0.47          | 60.82         | 1395498          | 405       |
| AK5YR.3.maxbin2.4   | Fence 3, 15-25 cm, Control | Bacteria       | 80.72        | 2.74          | 67.02         | 4881000          | 1011      |
| AK5YR.3.metabat2.3  | Fence 3, 15-25 cm, Control | Bacteria       | 94.83        | 1.88          | 85.43         | 3028190          | 352       |
| AK5YR.3.metabat2.5  | Fence 3, 15-25 cm, Control | Bacteria       | 83.75        | 0.66          | 80.45         | 7208858          | 1252      |
| AK5YR.4.maxbin2.1   | Fence 4, 15-25 cm, Control | Bacteria       | 82.41        | 0.78          | 78.51         | 6733584          | 1152      |
| AK5YR.4.maxbin2.13  | Fence 4, 15-25 cm, Control | Bacteria       | 81.9         | 0.31          | 80.35         | 3411634          | 759       |
| AK5YR.4.maxbin2.3   | Fence 4, 15-25 cm, Control | Bacteria       | 62.96        | 0             | 62.96         | 2234204          | 631       |
| AK5YR.4.maxbin2.8   | Fence 4, 15-25 cm, Control | Bacteria       | 99.53        | 3.45          | 82.28         | 6301634          | 799       |
| AK5YR.4.metabat2.13 | Fence 4, 15-25 cm, Control | Bacteria       | 70.69        | 2.07          | 60.34         | 2357896          | 463       |
| AK5YR.4.metabat2.14 | Fence 4, 15-25 cm, Control | Bacteria       | 80.49        | 0.69          | 77.04         | 4204278          | 628       |
| AK5YR.4.metabat2.16 | Fence 4, 15-25 cm, Control | Bacteria       | 64.05        | 0.31          | 62.5          | 2289783          | 406       |
| AK5YR.4.metabat2.3  | Fence 4, 15-25 cm, Control | Bacteria       | 66.38        | 0             | 66.38         | 5129989          | 831       |
| AK5YR.4.metabat2.8  | Fence 4, 15-25 cm, Control | Bacteria       | 75.97        | 1.57          | 68.12         | 7412611          | 1234      |
| AK5YR.5.maxbin2.16  | Fence 5, 15-25 cm, Control | Bacteria       | 65.72        | 0             | 65.72         | 4496059          | 1361      |
| AK5YR.5.maxbin2.5   | Fence 5, 15-25 cm, Control | Bacteria       | 76.96        | 1.72          | 68.36         | 4290350          | 906       |
| AK5YR.5.maxbin2.6   | Fence 5, 15-25 cm, Control | Bacteria       | 86.29        | 0.92          | 81.69         | 2512209          | 433       |
| AK5YR.5.metabat2.1  | Fence 5, 15-25 cm, Control | Bacteria       | 98.67        | 2.59          | 85.72         | 4232025          | 513       |
| AK5YR.5.metabat2.13 | Fence 5, 15-25 cm, Control | Bacteria       | 93.81        | 2.59          | 80.86         | 2510699          | 214       |
| AK5YR.5.metabat2.15 | Fence 5, 15-25 cm, Control | Bacteria       | 94.83        | 1.72          | 86.23         | 3551262          | 497       |
| AK5YR.5.metabat2.16 | Fence 5, 15-25 cm, Control | Bacteria       | 79.31        | 1.18          | 73.41         | 2244515          | 466       |
| AK5YR.5.metabat2.17 | Fence 5, 15-25 cm, Control | Bacteria       | 91.95        | 0             | 91.95         | 2486754          | 217       |
| AK5YR.5.metabat2.26 | Fence 5, 15-25 cm, Control | Bacteria       | 80.8         | 3.61          | 62.75         | 2860384          | 378       |
| AK5YR.5.metabat2.27 | Fence 5, 15-25 cm, Control | Bacteria       | 100          | 1.72          | 91.4          | 4178772          | 336       |
| AK5YR.5.metabat2.28 | Fence 5, 15-25 cm, Control | Bacteria       | 90.13        | 1.88          | 80.73         | 1916754          | 320       |
| AK5YR.5.metabat2.29 | Fence 5, 15-25 cm, Control | Bacteria       | 65.28        | 0.63          | 62.13         | 1773451          | 400       |
| AK5YR.5.metabat2.32 | Fence 5, 15-25 cm, Control | Bacteria       | 82.96        | 0             | 82.96         | 4210440          | 702       |
| AK5YR.5.metabat2.5  | Fence 5, 15-25 cm, Control | Bacteria       | 91.38        | 2.04          | 81.18         | 6007982          | 551       |
| AK5YR.6.metabat2.1  | Fence 6, 15-25 cm, Control | Bacteria       | 80.8         | 3.61          | 62.75         | 7320259          | 1173      |
| AK5YR.6.metabat2.3  | Fence 6, 15-25 cm, Control | Bacteria       | 89.66        | 3.16          | 73.86         | 2274186          | 525       |
| AK5YR.7.maxbin2.1   | Fence 1, 15-25 cm, Warmed  | Bacteria       | 94.1         | 0             | 94.1          | 7017134          | 675       |
| AK5YR.7.maxbin2.8   | Fence 1, 15-25 cm, Warmed  | Bacteria       | 74.71        | 1.88          | 65.31         | 4702110          | 1098      |
| AK5YR.7.metabat2.1  | Fence 1, 15-25 cm, Warmed  | Bacteria       | 94.83        | 0             | 94.83         | 2749748          | 221       |
| AK5YR.7.metabat2.7  | Fence 1, 15-25 cm, Warmed  | Bacteria       | 96.55        | 1.72          | 87.95         | 3581158          | 467       |
| AK5YR.7.metabat2.9  | Fence 1, 15-25 cm, Warmed  | Bacteria       | 74.53        | 0.16          | 73.73         | 5288811          | 1054      |
| AK5YR.8.maxbin2.3   | Fence 2, 15-25 cm, Warmed  | Bacteria       | 84.33        | 1.88          | 74.93         | 2447597          | 363       |
| AK5YR.8.metabat2.9  | Fence 2, 15-25 cm, Warmed  | Bacteria       | 97.41        | 0.16          | 96.61         | 3306291          | 191       |
| AK5YR.9.maxbin2.16  | Fence 3, 15-25 cm, Warmed  | Bacteria       | 68.02        | 1.13          | 62.37         | 2141514          | 656       |
| AK5YR.9.maxbin2.2   | Fence 3, 15-25 cm, Warmed  | Bacteria       | 96.68        | 1.88          | 87.28         | 7080299          | 528       |

|                      |                            |          |       |      |       |         |      |
|----------------------|----------------------------|----------|-------|------|-------|---------|------|
| AK5YR.9.maxbin2.7    | Fence 3, 15-25 cm, Warmed  | Bacteria | 71.96 | 0.86 | 67.66 | 2377888 | 618  |
| AK5YR.9.metabat2.11  | Fence 3, 15-25 cm, Warmed  | Bacteria | 62.54 | 0.16 | 61.74 | 3914657 | 752  |
| AK5YR.9.metabat2.13  | Fence 3, 15-25 cm, Warmed  | Bacteria | 86.78 | 1.72 | 78.18 | 8347157 | 627  |
| AK5YR.9.metabat2.14  | Fence 3, 15-25 cm, Warmed  | Bacteria | 81.43 | 0.57 | 78.58 | 8027617 | 1158 |
| AK5YR.9.metabat2.26  | Fence 3, 15-25 cm, Warmed  | Bacteria | 77.27 | 3.45 | 60.02 | 4722618 | 827  |
| AK5YR.9.metabat2.30  | Fence 3, 15-25 cm, Warmed  | Bacteria | 100   | 4.31 | 78.45 | 6142187 | 624  |
| AK5YR.11.maxbin2.4   | Fence 5, 15-25 cm, Warmed  | Bacteria | 80.25 | 2.19 | 69.3  | 4421421 | 1025 |
| AK5YR.11.metabat2.10 | Fence 5, 15-25 cm, Warmed  | Bacteria | 93.1  | 1.72 | 84.5  | 3244339 | 441  |
| AK5YR.12.maxbin2.1   | Fence 6, 15-25 cm, Warmed  | Bacteria | 97.41 | 2.8  | 83.41 | 6786960 | 457  |
| AK5YR.12.maxbin2.14  | Fence 6, 15-25 cm, Warmed  | Bacteria | 97.24 | 5.17 | 71.39 | 5820699 | 949  |
| AK5YR.12.maxbin2.17  | Fence 6, 15-25 cm, Warmed  | Bacteria | 93.89 | 1.72 | 85.29 | 3041336 | 528  |
| AK5YR.12.maxbin2.3   | Fence 6, 15-25 cm, Warmed  | Bacteria | 79    | 0.86 | 74.7  | 2782270 | 741  |
| AK5YR.12.maxbin2.30  | Fence 6, 15-25 cm, Warmed  | Bacteria | 76.96 | 1.72 | 68.36 | 2150201 | 393  |
| AK5YR.12.maxbin2.7   | Fence 6, 15-25 cm, Warmed  | Bacteria | 85.72 | 2.35 | 73.97 | 2191830 | 441  |
| AK5YR.12.maxbin2.9   | Fence 6, 15-25 cm, Warmed  | Bacteria | 81.43 | 3.92 | 61.83 | 2452804 | 471  |
| AK5YR.12.metabat2.18 | Fence 6, 15-25 cm, Warmed  | Bacteria | 84.72 | 1.72 | 76.12 | 2991341 | 373  |
| AK5YR.12.metabat2.2  | Fence 6, 15-25 cm, Warmed  | Bacteria | 95.69 | 2.74 | 81.99 | 3262588 | 251  |
| AK5YR.12.metabat2.20 | Fence 6, 15-25 cm, Warmed  | Bacteria | 94.83 | 0    | 94.83 | 3088664 | 447  |
| AK5YR.12.metabat2.34 | Fence 6, 15-25 cm, Warmed  | Bacteria | 69.37 | 0    | 69.37 | 4016944 | 865  |
| AK5YR.12.metabat2.37 | Fence 6, 15-25 cm, Warmed  | Bacteria | 92.24 | 3.61 | 74.19 | 4219648 | 491  |
| AK5YR.12.metabat2.5  | Fence 6, 15-25 cm, Warmed  | Bacteria | 77.04 | 2.04 | 66.84 | 2545634 | 522  |
| AK5YR.13.maxbin2.4   | Fence 1, 45-55 cm, Control | Bacteria | 90.52 | 0    | 90.52 | 2635641 | 610  |
| AK5YR.13.maxbin2.9   | Fence 1, 45-55 cm, Control | Bacteria | 90.36 | 0    | 90.36 | 2145657 | 452  |
| AK5YR.13.metabat2.1  | Fence 1, 45-55 cm, Control | Bacteria | 86.05 | 3.45 | 68.8  | 2887148 | 411  |
| AK5YR.13.metabat2.10 | Fence 1, 45-55 cm, Control | Bacteria | 84.48 | 0.5  | 81.98 | 3064316 | 398  |
| AK5YR.13.metabat2.12 | Fence 1, 45-55 cm, Control | Bacteria | 74.71 | 0.5  | 72.21 | 2575935 | 556  |
| AK5YR.13.metabat2.2  | Fence 1, 45-55 cm, Control | Bacteria | 84.09 | 0.31 | 82.54 | 2445485 | 329  |
| AK5YR.13.metabat2.4  | Fence 1, 45-55 cm, Control | Bacteria | 94.83 | 1.72 | 86.23 | 2909792 | 148  |
| AK5YR.13.metabat2.6  | Fence 1, 45-55 cm, Control | Bacteria | 74.83 | 1.88 | 65.43 | 2174775 | 443  |
| AK5YR.14.maxbin2.1   | Fence 2, 45-55 cm, Control | Bacteria | 74.53 | 2.46 | 62.23 | 3524556 | 960  |
| AK5YR.14.maxbin2.11  | Fence 2, 45-55 cm, Control | Bacteria | 77.66 | 2.04 | 67.46 | 1874466 | 425  |
| AK5YR.14.maxbin2.12  | Fence 2, 45-55 cm, Control | Bacteria | 96.55 | 0    | 96.55 | 3046720 | 229  |
| AK5YR.14.maxbin2.15  | Fence 2, 45-55 cm, Control | Archaea  | 86.84 | 0    | 86.84 | 1452226 | 175  |
| AK5YR.14.maxbin2.17  | Fence 2, 45-55 cm, Control | Bacteria | 91.38 | 1.72 | 82.78 | 2963116 | 555  |
| AK5YR.14.metabat2.1  | Fence 2, 45-55 cm, Control | Bacteria | 91.38 | 0    | 91.38 | 2927082 | 472  |
| AK5YR.14.metabat2.12 | Fence 2, 45-55 cm, Control | Bacteria | 93.1  | 2.93 | 78.45 | 4207425 | 510  |
| AK5YR.14.metabat2.16 | Fence 2, 45-55 cm, Control | Bacteria | 93.1  | 2.59 | 80.15 | 2860032 | 368  |
| AK5YR.14.metabat2.17 | Fence 2, 45-55 cm, Control | Bacteria | 88.32 | 1.88 | 78.92 | 1901843 | 258  |
| AK5YR.14.metabat2.18 | Fence 2, 45-55 cm, Control | Bacteria | 98.28 | 0    | 98.28 | 3312935 | 183  |
| AK5YR.14.metabat2.3  | Fence 2, 45-55 cm, Control | Bacteria | 61.76 | 0.16 | 60.96 | 953407  | 245  |
| AK5YR.15.maxbin2.16  | Fence 3, 45-55 cm, Control | Bacteria | 95.69 | 1.72 | 87.09 | 2719254 | 287  |
| AK5YR.15.metabat2.11 | Fence 3, 45-55 cm, Control | Bacteria | 86.21 | 0    | 86.21 | 2449717 | 435  |
| AK5YR.15.metabat2.12 | Fence 3, 45-55 cm, Control | Bacteria | 82.45 | 1.72 | 73.85 | 3020330 | 589  |
| AK5YR.15.metabat2.13 | Fence 3, 45-55 cm, Control | Archaea  | 93.46 | 1.87 | 84.11 | 1611189 | 130  |
| AK5YR.15.metabat2.14 | Fence 3, 45-55 cm, Control | Bacteria | 82.76 | 1.72 | 74.16 | 2467312 | 344  |
| AK5YR.15.metabat2.16 | Fence 3, 45-55 cm, Control | Bacteria | 70.22 | 0.16 | 69.42 | 1961198 | 347  |
| AK5YR.15.metabat2.20 | Fence 3, 45-55 cm, Control | Bacteria | 62.07 | 0    | 62.07 | 4718258 | 1001 |
| AK5YR.15.metabat2.4  | Fence 3, 45-55 cm, Control | Bacteria | 97.49 | 2.07 | 87.14 | 4566485 | 508  |
| AK5YR.16.maxbin2.1   | Fence 4, 45-55 cm, Control | Bacteria | 74.01 | 0    | 74.01 | 3419166 | 937  |
| AK5YR.16.maxbin2.10  | Fence 4, 45-55 cm, Control | Bacteria | 77.56 | 0.31 | 76.01 | 3166771 | 623  |

|                      |                            |          |       |      |       |         |      |
|----------------------|----------------------------|----------|-------|------|-------|---------|------|
| AK5YR.16.maxbin2.17  | Fence 4, 45-55 cm, Control | Archaea  | 97.9  | 0    | 97.9  | 2071984 | 46   |
| AK5YR.16.maxbin2.3   | Fence 4, 45-55 cm, Control | Bacteria | 71.55 | 0    | 71.55 | 2127275 | 490  |
| AK5YR.16.metabat2.1  | Fence 4, 45-55 cm, Control | Bacteria | 93.89 | 1.72 | 85.29 | 2404926 | 285  |
| AK5YR.16.metabat2.11 | Fence 4, 45-55 cm, Control | Bacteria | 87.7  | 2.07 | 77.35 | 3327915 | 470  |
| AK5YR.16.metabat2.13 | Fence 4, 45-55 cm, Control | Bacteria | 67.16 | 0.63 | 64.01 | 2992352 | 698  |
| AK5YR.16.metabat2.14 | Fence 4, 45-55 cm, Control | Bacteria | 100   | 1.72 | 91.4  | 3247612 | 94   |
| AK5YR.16.metabat2.17 | Fence 4, 45-55 cm, Control | Bacteria | 63.24 | 0.57 | 60.39 | 1287653 | 291  |
| AK5YR.16.metabat2.21 | Fence 4, 45-55 cm, Control | Bacteria | 71.43 | 1.72 | 62.83 | 2597850 | 452  |
| AK5YR.16.metabat2.25 | Fence 4, 45-55 cm, Control | Bacteria | 90.44 | 0.34 | 88.74 | 3896438 | 495  |
| AK5YR.16.metabat2.7  | Fence 4, 45-55 cm, Control | Bacteria | 84.48 | 0    | 84.48 | 1705289 | 290  |
| AK5YR.17.maxbin2.1   | Fence 5, 45-55 cm, Control | Bacteria | 81.9  | 4.29 | 60.45 | 4127436 | 1154 |
| AK5YR.17.maxbin2.11  | Fence 5, 45-55 cm, Control | Bacteria | 96.55 | 1.72 | 87.95 | 2378607 | 416  |
| AK5YR.17.maxbin2.16  | Fence 5, 45-55 cm, Control | Bacteria | 73.51 | 1.88 | 64.11 | 4033749 | 996  |
| AK5YR.17.maxbin2.4   | Fence 5, 45-55 cm, Control | Bacteria | 85.89 | 3.61 | 67.84 | 3152720 | 715  |
| AK5YR.17.metabat2.1  | Fence 5, 45-55 cm, Control | Archaea  | 96.26 | 0    | 96.26 | 1593083 | 82   |
| AK5YR.17.metabat2.10 | Fence 5, 45-55 cm, Control | Bacteria | 73.51 | 2.35 | 61.76 | 2088182 | 374  |
| AK5YR.17.metabat2.12 | Fence 5, 45-55 cm, Control | Bacteria | 62.65 | 0    | 62.65 | 2448597 | 466  |
| AK5YR.17.metabat2.16 | Fence 5, 45-55 cm, Control | Bacteria | 86.79 | 1.21 | 80.74 | 3880390 | 482  |
| AK5YR.17.metabat2.2  | Fence 5, 45-55 cm, Control | Bacteria | 93.1  | 3.45 | 75.85 | 2705578 | 251  |
| AK5YR.18.maxbin2.15  | Fence 6, 45-55 cm, Control | Bacteria | 76.49 | 0.16 | 75.69 | 1484817 | 364  |
| AK5YR.18.maxbin2.8   | Fence 6, 45-55 cm, Control | Bacteria | 94.83 | 2.07 | 84.48 | 4452424 | 679  |
| AK5YR.18.metabat2.10 | Fence 6, 45-55 cm, Control | Bacteria | 72.41 | 1.02 | 67.31 | 2144487 | 454  |
| AK5YR.18.metabat2.19 | Fence 6, 45-55 cm, Control | Bacteria | 89.5  | 0.16 | 88.7  | 2915605 | 495  |
| AK5YR.18.metabat2.21 | Fence 6, 45-55 cm, Control | Bacteria | 89.37 | 1.72 | 80.77 | 2481013 | 268  |
| AK5YR.18.metabat2.5  | Fence 6, 45-55 cm, Control | Bacteria | 82.76 | 0.5  | 80.26 | 2344929 | 420  |
| AK5YR.18.metabat2.7  | Fence 6, 45-55 cm, Control | Archaea  | 95.33 | 0.93 | 90.68 | 1655771 | 98   |
| AK5YR.19.maxbin2.10  | Fence 1, 45-55 cm, Warmed  | Bacteria | 78.92 | 2.3  | 67.42 | 2187609 | 512  |
| AK5YR.19.maxbin2.18  | Fence 1, 45-55 cm, Warmed  | Bacteria | 80.69 | 1.72 | 72.09 | 2316475 | 573  |
| AK5YR.19.maxbin2.22  | Fence 1, 45-55 cm, Warmed  | Archaea  | 81.24 | 0    | 81.24 | 2337627 | 337  |
| AK5YR.19.maxbin2.5   | Fence 1, 45-55 cm, Warmed  | Bacteria | 98.28 | 2.07 | 87.93 | 3129873 | 272  |
| AK5YR.19.metabat2.10 | Fence 1, 45-55 cm, Warmed  | Bacteria | 100   | 0.86 | 95.7  | 2625374 | 332  |
| AK5YR.19.metabat2.14 | Fence 1, 45-55 cm, Warmed  | Archaea  | 81.25 | 2.34 | 69.55 | 1127689 | 197  |
| AK5YR.19.metabat2.17 | Fence 1, 45-55 cm, Warmed  | Bacteria | 93.97 | 0    | 93.97 | 2445731 | 224  |
| AK5YR.19.metabat2.21 | Fence 1, 45-55 cm, Warmed  | Bacteria | 96.55 | 3.45 | 79.3  | 3211898 | 430  |
| AK5YR.19.metabat2.25 | Fence 1, 45-55 cm, Warmed  | Bacteria | 62.38 | 0.16 | 61.58 | 2427514 | 525  |
| AK5YR.19.metabat2.30 | Fence 1, 45-55 cm, Warmed  | Bacteria | 69.59 | 0    | 69.59 | 1550092 | 344  |
| AK5YR.19.metabat2.8  | Fence 1, 45-55 cm, Warmed  | Bacteria | 63.17 | 0    | 63.17 | 1620299 | 321  |
| AK5YR.20.metabat2.3  | Fence 2, 45-55 cm, Warmed  | Bacteria | 99.14 | 3.45 | 81.89 | 3283277 | 202  |
| AK5YR.20.metabat2.7  | Fence 2, 45-55 cm, Warmed  | Bacteria | 66.38 | 0    | 66.38 | 1813899 | 354  |
| AK5YR.20.metabat2.9  | Fence 2, 45-55 cm, Warmed  | Bacteria | 94.2  | 0.16 | 93.4  | 2812684 | 338  |
| AK5YR.21.maxbin2.18  | Fence 3, 45-55 cm, Warmed  | Bacteria | 87.62 | 1.72 | 79.02 | 2986873 | 333  |
| AK5YR.21.maxbin2.2   | Fence 3, 45-55 cm, Warmed  | Bacteria | 88.79 | 0.31 | 87.24 | 2831058 | 417  |
| AK5YR.21.maxbin2.5   | Fence 3, 45-55 cm, Warmed  | Bacteria | 92.53 | 1.18 | 86.63 | 2673271 | 482  |
| AK5YR.21.maxbin2.8   | Fence 3, 45-55 cm, Warmed  | Bacteria | 93.1  | 0    | 93.1  | 4148668 | 513  |
| AK5YR.21.metabat2.10 | Fence 3, 45-55 cm, Warmed  | Bacteria | 75.86 | 1.72 | 67.26 | 2729910 | 568  |
| AK5YR.21.metabat2.11 | Fence 3, 45-55 cm, Warmed  | Archaea  | 74.55 | 0.93 | 69.9  | 2480889 | 528  |
| AK5YR.21.metabat2.13 | Fence 3, 45-55 cm, Warmed  | Bacteria | 93.1  | 0.34 | 91.4  | 4257681 | 486  |
| AK5YR.21.metabat2.14 | Fence 3, 45-55 cm, Warmed  | Bacteria | 85.11 | 1.72 | 76.51 | 2541403 | 297  |
| AK5YR.21.metabat2.17 | Fence 3, 45-55 cm, Warmed  | Bacteria | 85.34 | 0    | 85.34 | 2409094 | 436  |
| AK5YR.21.metabat2.23 | Fence 3, 45-55 cm, Warmed  | Bacteria | 92.24 | 0    | 92.24 | 2169025 | 59   |

|                      |                           |          |       |      |       |         |     |
|----------------------|---------------------------|----------|-------|------|-------|---------|-----|
| AK5YR.21.metabat2.25 | Fence 3, 45-55 cm, Warmed | Bacteria | 82.18 | 0    | 82.18 | 2901203 | 491 |
| AK5YR.21.metabat2.5  | Fence 3, 45-55 cm, Warmed | Archaea  | 67.06 | 0.93 | 62.41 | 1112371 | 211 |
| AK5YR.21.metabat2.8  | Fence 3, 45-55 cm, Warmed | Bacteria | 98.28 | 1.72 | 89.68 | 3274953 | 247 |
| AK5YR.22.maxbin2.4   | Fence 4, 45-55 cm, Warmed | Bacteria | 92.24 | 0    | 92.24 | 3163516 | 422 |
| AK5YR.22.metabat2.11 | Fence 4, 45-55 cm, Warmed | Bacteria | 86.21 | 0    | 86.21 | 3042565 | 411 |
| AK5YR.22.metabat2.12 | Fence 4, 45-55 cm, Warmed | Bacteria | 68.16 | 0    | 68.16 | 1719663 | 398 |
| AK5YR.22.metabat2.14 | Fence 4, 45-55 cm, Warmed | Bacteria | 86.05 | 0    | 86.05 | 2603937 | 532 |
| AK5YR.22.metabat2.16 | Fence 4, 45-55 cm, Warmed | Bacteria | 68.81 | 0.5  | 66.31 | 805369  | 94  |
| AK5YR.22.metabat2.18 | Fence 4, 45-55 cm, Warmed | Bacteria | 74.92 | 2.59 | 61.97 | 2611838 | 288 |
| AK5YR.22.metabat2.2  | Fence 4, 45-55 cm, Warmed | Archaea  | 98.13 | 0.93 | 93.48 | 1663619 | 154 |
| AK5YR.22.metabat2.5  | Fence 4, 45-55 cm, Warmed | Bacteria | 91.38 | 2.59 | 78.43 | 3321573 | 349 |
| AK5YR.22.metabat2.9  | Fence 4, 45-55 cm, Warmed | Bacteria | 70.42 | 0.16 | 69.62 | 1897201 | 408 |
| AK5YR.23.maxbin2.10  | Fence 5, 45-55 cm, Warmed | Archaea  | 96.26 | 1.55 | 88.51 | 2342076 | 327 |
| AK5YR.23.maxbin2.5   | Fence 5, 45-55 cm, Warmed | Bacteria | 71.08 | 0    | 71.08 | 1981316 | 546 |
| AK5YR.23.maxbin2.8   | Fence 5, 45-55 cm, Warmed | Bacteria | 80.3  | 1.52 | 72.7  | 3136795 | 825 |
| AK5YR.23.metabat2.1  | Fence 5, 45-55 cm, Warmed | Bacteria | 90.2  | 0    | 90.2  | 3073885 | 418 |
| AK5YR.23.metabat2.11 | Fence 5, 45-55 cm, Warmed | Bacteria | 84.48 | 0.86 | 80.18 | 3011590 | 467 |
| AK5YR.23.metabat2.4  | Fence 5, 45-55 cm, Warmed | Bacteria | 87.24 | 0.16 | 86.44 | 2157427 | 301 |
| AK5YR.23.metabat2.5  | Fence 5, 45-55 cm, Warmed | Bacteria | 83.33 | 2.23 | 72.18 | 2976523 | 538 |
| AK5YR.24.maxbin2.14  | Fence 6, 45-55 cm, Warmed | Archaea  | 68.07 | 1.4  | 61.07 | 1274598 | 312 |
| AK5YR.24.maxbin2.15  | Fence 6, 45-55 cm, Warmed | Bacteria | 85.29 | 0    | 85.29 | 2583362 | 570 |
| AK5YR.24.maxbin2.17  | Fence 6, 45-55 cm, Warmed | Bacteria | 81.03 | 3.61 | 62.98 | 2315733 | 541 |
| AK5YR.24.maxbin2.9   | Fence 6, 45-55 cm, Warmed | Archaea  | 66.85 | 0.93 | 62.2  | 1197383 | 311 |
| AK5YR.24.metabat2.15 | Fence 6, 45-55 cm, Warmed | Bacteria | 79.14 | 0.89 | 74.69 | 2715553 | 586 |
| AK5YR.24.metabat2.6  | Fence 6, 45-55 cm, Warmed | Bacteria | 90.44 | 3.95 | 70.69 | 3077374 | 519 |
| AK5YR.24.metabat2.9  | Fence 6, 45-55 cm, Warmed | Bacteria | 96.55 | 0    | 96.55 | 3260802 | 443 |

**Table S4: Taxonomic classifications of metagenome-assembled genomes (MAGs), derived from GTDB-Tk.**

| MAG ID              | GTDBtk taxonomic classification                                                                                 |
|---------------------|-----------------------------------------------------------------------------------------------------------------|
| AK5YR.2.maxbin2.1   | d__Bacteria;p__Acidobacteriota;c__Acidobacteriae;o__Acidobacteriales;f__Koribacteraceae;g__s__                  |
| AK5YR.2.maxbin2.7   | d__Bacteria;p__Dormibacterota;c__Dormibacteria;o__UBA8260;f__UBA8260;g__UBA8260;s__                             |
| AK5YR.2.maxbin2.12  | d__Bacteria;p__Actinobacteriota;c__Actinobacteria;o__Streptosporangiales;f__Streptosporangiaceae;g__UBA8262;s__ |
| AK5YR.2.metabat2.9  | d__Bacteria;p__Actinobacteriota;c__Thermoleophilia;o__Solirubrobacterales;f__Solirubrobacteraceae;g__s__        |
| AK5YR.2.metabat2.12 | d__Bacteria;p__Acidobacteriota;c__Thermoanaerobaculia;o__UBA5066;f__UBA5066;g__s__                              |
| AK5YR.2.metabat2.14 | d__Bacteria;p__Proteobacteria;c__Gammaproteobacteria;o__Steroidobacterales;f__Steroidobacteraceae;g__s__        |
| AK5YR.2.metabat2.17 | d__Bacteria;p__Actinobacteriota;c__Acidimicrobiia;o__Acidimicrobiales;f__g__s__                                 |
| AK5YR.2.metabat2.25 | d__Bacteria;p__Acidobacteriota;c__Acidobacteriae;o__Solibacterales;f__Solibacteraceae;g__Solibacter;s__         |
| AK5YR.3.maxbin2.1   | d__Bacteria;p__Acidobacteriota;c__Acidobacteriae;o__Acidobacteriales;f__Koribacteraceae;g__s__                  |
| AK5YR.3.maxbin2.4   | d__Bacteria;p__Acidobacteriota;c__Acidobacteriae;o__Acidobacteriales;f__Koribacteraceae;g__s__                  |
| AK5YR.3.maxbin2.10  | d__Bacteria;p__Dormibacterota;c__Dormibacteria;o__UBA8260;f__UBA8260;g__UBA8260;s__                             |
| AK5YR.3.metabat2.3  | d__Bacteria;p__Dormibacterota;c__Dormibacteria;o__UBA8260;f__UBA8260;g__s__                                     |
| AK5YR.3.metabat2.5  | d__Bacteria;p__Acidobacteriota;c__Acidobacteriae;o__Solibacterales;f__Solibacteraceae;g__Solibacter;s__         |
| AK5YR.4.maxbin2.1   | d__Bacteria;p__Acidobacteriota;c__Acidobacteriae;o__Acidobacteriales;f__Koribacteraceae;g__s__                  |



AK5YR.4.maxbin2.3 d\_Bacteria;p\_\_Proteobacteria;c\_\_Gammaproteobacteria;o\_\_Steroidobacterales;f\_\_Steroidobacteraceae;g\_\_s\_\_

AK5YR.4.maxbin2.8 d\_Bacteria;p\_\_Actinobacteriota;c\_\_Actinobacteria;o\_\_Streptosporangiales;f\_\_Streptosporangiaceae;g\_\_UBA8262;s\_\_

AK5YR.4.maxbin2.13 d\_Bacteria;p\_\_Actinobacteriota;c\_\_Acidimicrobiia;o\_\_Acidimicrobiales;f\_\_g\_\_s\_\_

AK5YR.4.metabat2.3 d\_Bacteria;p\_\_Acidobacteriota;c\_\_Acidobacteriae;o\_\_Acidobacteriales;f\_\_Koribacteraceae;g\_\_s\_\_

AK5YR.4.metabat2.8 d\_Bacteria;p\_\_Acidobacteriota;c\_\_Acidobacteriae;o\_\_Solibacterales;f\_\_Solibacteraceae;g\_\_Solibacter;s\_\_

AK5YR.4.metabat2.13 d\_Bacteria;p\_\_Dormibacterota;c\_\_Dormibacteria;o\_\_UBA8260;f\_\_UBA8260;g\_\_s\_\_

AK5YR.4.metabat2.14 d\_Bacteria;p\_\_Acidobacteriota;c\_\_Acidobacteriae;o\_\_Acidobacteriales;f\_\_Koribacteraceae;g\_\_s\_\_

AK5YR.4.metabat2.16 d\_Bacteria;p\_\_Actinobacteriota;c\_\_Thermoleophilia;o\_\_Solirubrobacterales;f\_\_Solirubrobacteraceae;g\_\_s\_\_

AK5YR.5.maxbin2.5 d\_Bacteria;p\_\_Acidobacteriota;c\_\_Acidobacteriae;o\_\_Acidobacteriales;f\_\_Koribacteraceae;g\_\_s\_\_

AK5YR.5.maxbin2.6 d\_Bacteria;p\_\_Dormibacterota;c\_\_Dormibacteria;o\_\_UBA8260;f\_\_UBA8260;g\_\_UBA8260;s\_\_

AK5YR.5.maxbin2.16 d\_Bacteria;p\_\_Acidobacteriota;c\_\_Acidobacteriae;o\_\_Solibacterales;f\_\_Solibacteraceae;g\_\_Solibacter;s\_\_

AK5YR.5.metabat2.1 d\_Bacteria;p\_\_Acidobacteriota;c\_\_Acidobacteriae;o\_\_Acidobacteriales;f\_\_Koribacteraceae;g\_\_s\_\_

AK5YR.5.metabat2.5 d\_Bacteria;p\_\_Acidobacteriota;c\_\_Acidobacteriae;o\_\_Acidobacteriales;f\_\_Koribacteraceae;g\_\_s\_\_

AK5YR.5.metabat2.13 d\_Bacteria;p\_\_Actinobacteriota;c\_\_Thermoleophilia;o\_\_Solirubrobacterales;f\_\_Solirubrobacteraceae;g\_\_s\_\_

AK5YR.5.metabat2.15 d\_Bacteria;p\_\_Actinobacteriota;c\_\_Acidimicrobiia;o\_\_Acidimicrobiales;f\_\_UBA7543;g\_\_UBA7543;s\_\_

AK5YR.5.metabat2.16 d\_Bacteria;p\_\_Proteobacteria;c\_\_Gammaproteobacteria;o\_\_Steroidobacterales;f\_\_Steroidobacteraceae;g\_\_s\_\_

AK5YR.5.metabat2.17 d\_Bacteria;p\_\_Proteobacteria;c\_\_Gammaproteobacteria;o\_\_Betaproteobacterales;f\_\_Gallionellaceae;g\_\_Gallionella;s\_\_

AK5YR.5.metabat2.26 d\_Bacteria;p\_\_Acidobacteriota;c\_\_Acidobacteriae;o\_\_Acidobacteriales;f\_\_Acidobacteriaceae;g\_\_Terracidiphilus;s\_\_

AK5YR.5.metabat2.27 d\_Bacteria;p\_\_Proteobacteria;c\_\_Gammaproteobacteria;o\_\_Steroidobacterales;f\_\_Steroidobacteraceae;g\_\_s\_\_

AK5YR.5.metabat2.28 d\_Bacteria;p\_\_Actinobacteriota;c\_\_Acidimicrobiia;o\_\_Acidimicrobiales;f\_\_RAAP-2;g\_\_RAAP-2;s\_\_

AK5YR.5.metabat2.29 d\_Bacteria;p\_\_UBP10;c\_\_GR-WP33-30;o\_\_UBA7539;f\_\_UBA7539;g\_\_UBA7539;s\_\_

AK5YR.5.metabat2.32 d\_Bacteria;p\_\_Actinobacteriota;c\_\_Thermoleophilia;o\_\_Solirubrobacterales;f\_\_Solirubrobacteraceae;g\_\_Conexibacter;s\_\_

AK5YR.6.metabat2.1 d\_Bacteria;p\_\_Actinobacteriota;c\_\_Actinobacteria;o\_\_Streptosporangiales;f\_\_Streptosporangiaceae;g\_\_UBA9676;s\_\_

AK5YR.6.metabat2.3 d\_Bacteria;p\_\_Dormibacterota;c\_\_Dormibacteria;o\_\_UBA8260;f\_\_UBA8260;g\_\_s\_\_

AK5YR.7.maxbin2.1 d\_Bacteria;p\_\_Acidobacteriota;c\_\_Acidobacteriae;o\_\_Acidobacteriales;f\_\_Koribacteraceae;g\_\_s\_\_

AK5YR.7.maxbin2.8 d\_Bacteria;p\_\_Actinobacteriota;c\_\_Actinobacteria;o\_\_Streptosporangiales;f\_\_Streptosporangiaceae;g\_\_UBA8262;s\_\_

AK5YR.7.metabat2.1 d\_Bacteria;p\_\_Verrucomicrobiota;c\_\_Verrucomicrobiae;o\_\_Chthoniobacterales;f\_\_UBA10450;g\_\_s\_\_

AK5YR.7.metabat2.7 d\_Bacteria;p\_\_Proteobacteria;c\_\_Gammaproteobacteria;o\_\_Steroidobacterales;f\_\_Steroidobacteraceae;g\_\_s\_\_

AK5YR.7.metabat2.9 d\_Bacteria;p\_\_Actinobacteriota;c\_\_Actinobacteria;o\_\_Streptosporangiales;f\_\_Streptosporangiaceae;g\_\_UBA9676;s\_\_

AK5YR.8.maxbin2.3 d\_Bacteria;p\_\_Proteobacteria;c\_\_Gammaproteobacteria;o\_\_Betaproteobacterales;f\_\_Gallionellaceae;g\_\_Gallionella;s\_\_

AK5YR.8.metabat2.9 d\_Bacteria;p\_\_Dormibacterota;c\_\_Dormibacteria;o\_\_UBA8260;f\_\_UBA8260;g\_\_s\_\_

AK5YR.9.maxbin2.2 d\_Bacteria;p\_\_Acidobacteriota;c\_\_Acidobacteriae;o\_\_Acidobacteriales;f\_\_Koribacteraceae;g\_\_s\_\_

AK5YR.9.maxbin2.7 d\_Bacteria;p\_\_Actinobacteriota;c\_\_Acidimicrobiia;o\_\_Acidimicrobiales;f\_\_UBA7543;g\_\_UBA7543;s\_\_

AK5YR.9.maxbin2.16 d\_Bacteria;p\_\_Actinobacteriota;c\_\_Acidimicrobiia;o\_\_Acidimicrobiales;f\_\_g\_\_s\_\_

AK5YR.9.metabat2.11 d\_Bacteria;p\_\_Proteobacteria;c\_\_Gammaproteobacteria;o\_\_Steroidobacterales;f\_\_Steroidobacteraceae;g\_\_s\_\_

AK5YR.9.metabat2.13 d\_Bacteria;p\_\_Acidobacteriota;c\_\_Acidobacteriae;o\_\_Solibacterales;f\_\_Solibacteraceae;g\_\_s\_\_

AK5YR.9.metabat2.14 d\_Bacteria;p\_\_Acidobacteriota;c\_\_Acidobacteriae;o\_\_Solibacterales;f\_\_Solibacteraceae;g\_\_Solibacter;s\_\_

AK5YR.9.metabat2.26 d\_Bacteria;p\_\_Actinobacteriota;c\_\_Actinobacteria;o\_\_Streptosporangiales;f\_\_Streptosporangiaceae;g\_\_UBA8262;s\_\_

AK5YR.9.metabat2.30 d\_Bacteria;p\_\_Actinobacteriota;c\_\_Actinobacteria;o\_\_Streptosporangiales;f\_\_Streptosporangiaceae;g\_\_UBA8262;s\_\_

AK5YR.11.maxbin2.4 d\_Bacteria;p\_\_Acidobacteriota;c\_\_Acidobacteriae;o\_\_Acidobacteriales;f\_\_Koribacteraceae;g\_\_s\_\_

AK5YR.11.metabat2.10 d\_Bacteria;p\_\_Proteobacteria;c\_\_Gammaproteobacteria;o\_\_Steroidobacterales;f\_\_Steroidobacteraceae;g\_\_s\_\_

AK5YR.12.maxbin2.1 d\_Bacteria;p\_\_Acidobacteriota;c\_\_Acidobacteriae;o\_\_Acidobacteriales;f\_\_Koribacteraceae;g\_\_s\_\_

AK5YR.12.maxbin2.3 d\_Bacteria;p\_\_Proteobacteria;c\_\_Gammaproteobacteria;o\_\_Steroidobacterales;f\_\_Steroidobacteraceae;g\_\_s\_\_

AK5YR.12.maxbin2.7 d\_Bacteria;p\_\_Actinobacteriota;c\_\_Acidimicrobiia;o\_\_Acidimicrobiales;f\_\_RAAP-2;g\_\_RAAP-2;s\_\_

AK5YR.12.maxbin2.9 d\_Bacteria;p\_\_Dormibacterota;c\_\_Dormibacteria;o\_\_UBA8260;f\_\_UBA8260;g\_\_UBA8260;s\_\_

AK5YR.12.maxbin2.14 d\_Bacteria;p\_\_Actinobacteriota;c\_\_Actinobacteria;o\_\_Streptosporangiales;f\_\_Streptosporangiaceae;g\_\_UBA8262;s\_\_

AK5YR.12.maxbin2.17 d\_Bacteria;p\_\_Actinobacteriota;c\_\_Thermoleophilia;o\_\_Solirubrobacterales;f\_\_Solirubrobacteraceae;g\_\_s\_\_

AK5YR.12.maxbin2.30 d\_Bacteria;p\_\_Actinobacteriota;c\_\_Thermoleophilia;o\_\_Solirubrobacterales;f\_\_Solirubrobacteraceae;g\_\_s\_\_

AK5YR.12.metabat2.2 d\_Bacteria;p\_\_Acidobacteriota;c\_\_Acidobacteriae;o\_\_Acidobacteriales;f\_\_Acidobacteriaceae;g\_\_Terracidiphilus;s\_\_

AK5YR.12.metabat2.5 d\_Bacteria;p\_\_Acidobacteriota;c\_\_Thermoanaerobaculia;o\_\_UBA5066;f\_\_UBA5066;g\_\_s\_\_

AK5YR.12.metabat2.18 d\_Bacteria;p\_Acidobacteriota;c\_Acidobacteriae;o\_Acidobacteriales;f\_Acidobacteriaceae;g\_Terracidiphilus;s\_\_

AK5YR.12.metabat2.20 d\_Bacteria;p\_Actinobacteriota;c\_Acidimicrobiia;o\_Acidimicrobiales;f\_UBA7543;g\_UBA7543;s\_\_

AK5YR.12.metabat2.34 d\_Bacteria;p\_Acidobacteriota;c\_Acidobacteriae;o\_Solibacterales;f\_Solibacteraceae;g\_Solibacter;s\_\_

AK5YR.12.metabat2.37 d\_Bacteria;p\_Acidobacteriota;c\_Acidobacteriae;o\_Acidobacteriales;f\_Koribacteraceae;g\_\_;s\_\_

AK5YR.13.maxbin2.4 d\_Bacteria;p\_Actinobacteriota;c\_Acidimicrobiia;o\_Acidimicrobiales;f\_UBA8190;g\_\_;s\_\_

AK5YR.13.maxbin2.9 d\_Bacteria;p\_Dormibacterota;c\_Dormibacteria;o\_UBA8260;f\_UBA8260;g\_\_;s\_\_

AK5YR.13.metabat2.1 d\_Bacteria;p\_Bacteroidota;c\_Bacteroidia;o\_Chitinophagales;f\_Chitinophagaceae;g\_65-1;s\_\_

AK5YR.13.metabat2.2 d\_Bacteria;p\_Gemmatimonadota;c\_Gemmatimonadetes;o\_Gemmatimonadales;f\_Gemmatimonadaceae;g\_UBA4720;s\_\_

AK5YR.13.metabat2.4 d\_Bacteria;p\_Chloroflexota;c\_Ellin6529;o\_CSP1-4;f\_CSP1-4;g\_\_;s\_\_

AK5YR.13.metabat2.6 d\_Bacteria;p\_Acidobacteriota;c\_Thermoanaerobaculia;o\_UBA5066;f\_UBA5066;g\_\_;s\_\_

AK5YR.13.metabat2.10 d\_Bacteria;p\_UBP10;c\_GR-WP33-30;o\_UBA7539;f\_UBA7539;g\_UBA7539;s\_\_

AK5YR.13.metabat2.12 d\_Bacteria;p\_Proteobacteria;c\_Alphaproteobacteria;o\_Rhizobiales;f\_Xanthobacteraceae;g\_Pseudolabrys;s\_\_

AK5YR.14.maxbin2.1 d\_Bacteria;p\_Proteobacteria;c\_Alphaproteobacteria;o\_Rhizobiales;f\_Xanthobacteraceae;g\_Pseudolabrys;s\_\_

AK5YR.14.maxbin2.11 d\_Bacteria;p\_Dormibacterota;c\_Dormibacteria;o\_UBA8260;f\_UBA8260;g\_\_;s\_\_

AK5YR.14.maxbin2.12 d\_Bacteria;p\_Chloroflexota;c\_Ellin6529;o\_CSP1-4;f\_CSP1-4;g\_\_;s\_\_

AK5YR.14.maxbin2.15 d\_Archaea;p\_Halobacterota;c\_Methanosarcinia;o\_UBA590;f\_UBA590;g\_UBA590;s\_\_

AK5YR.14.maxbin2.17 d\_Bacteria;p\_Bacteroidota;c\_Bacteroidia;o\_Chitinophagales;f\_Chitinophagaceae;g\_65-1;s\_\_

AK5YR.14.metabat2.1 d\_Bacteria;p\_Proteobacteria;c\_Gammaproteobacteria;o\_Betaproteobacteriales;f\_SG8-39;g\_2-12-FULL-64-23;s\_\_

AK5YR.14.metabat2.3 d\_Bacteria;p\_Actinobacteriota;c\_Thermoleophilia;o\_20CM-4-69-9;f\_20CM-4-69-9;g\_\_;s\_\_

AK5YR.14.metabat2.12 d\_Bacteria;p\_Actinobacteriota;c\_Actinobacteria;o\_Actinomycetales;f\_Dermatophilaceae;g\_UBA4719;s\_\_

AK5YR.14.metabat2.16 d\_Bacteria;p\_Acidobacteriota;c\_Thermoanaerobaculia;o\_UBA5066;f\_UBA5066;g\_\_;s\_\_

AK5YR.14.metabat2.17 d\_Bacteria;p\_Proteobacteria;c\_Gammaproteobacteria;o\_Betaproteobacteriales;f\_Gallionellaceae;g\_Gallionella;s\_\_

AK5YR.14.metabat2.18 d\_Bacteria;p\_UBP10;c\_GR-WP33-30;o\_UBA7539;f\_UBA7539;g\_UBA7539;s\_\_

AK5YR.15.maxbin2.16 d\_Bacteria;p\_Dormibacterota;c\_Dormibacteria;o\_UBA8260;f\_UBA8260;g\_\_;s\_\_

AK5YR.15.metabat2.4 d\_Bacteria;p\_Actinobacteriota;c\_Actinobacteria;o\_Actinomycetales;f\_Dermatophilaceae;g\_UBA4719;s\_\_

AK5YR.15.metabat2.11 d\_Bacteria;p\_Bacteroidota;c\_Bacteroidia;o\_Chitinophagales;f\_Chitinophagaceae;g\_65-1;s\_\_

AK5YR.15.metabat2.12 d\_Bacteria;p\_Actinobacteriota;c\_Thermoleophilia;o\_Solirubrobacterales;f\_Solirubrobacteraceae;g\_Conexibacter;s\_\_

AK5YR.15.metabat2.13 d\_Archaea;p\_Halobacterota;c\_Methanosarcinia;o\_UBA590;f\_UBA590;g\_UBA590;s\_\_

AK5YR.15.metabat2.14 d\_Bacteria;p\_Actinobacteriota;c\_Thermoleophilia;o\_Solirubrobacterales;f\_Solirubrobacteraceae;g\_\_;s\_\_

AK5YR.15.metabat2.16 d\_Bacteria;p\_Actinobacteriota;c\_Acidimicrobiia;o\_Acidimicrobiales;f\_RAAP-2;g\_RAAP-2;s\_\_

AK5YR.15.metabat2.20 d\_Bacteria;p\_Acidobacteriota;c\_Acidobacteriae;o\_Solibacterales;f\_Solibacteraceae;g\_Solibacter;s\_\_

AK5YR.16.maxbin2.1 d\_Bacteria;p\_Proteobacteria;c\_Alphaproteobacteria;o\_Rhizobiales;f\_Xanthobacteraceae;g\_Pseudolabrys;s\_\_

AK5YR.16.maxbin2.3 d\_Bacteria;p\_Dormibacterota;c\_Dormibacteria;o\_UBA8260;f\_UBA8260;g\_UBA8260;s\_\_

AK5YR.16.maxbin2.10 d\_Bacteria;p\_Acidobacteriota;c\_Acidobacteriae;o\_Acidobacteriales;f\_Acidobacteriaceae;g\_Terracidiphilus;s\_\_

AK5YR.16.maxbin2.17 d\_Archaea;p\_Halobacterota;c\_Methanosarcinia;o\_UBA590;f\_UBA590;g\_UBA590;s\_\_

AK5YR.16.metabat2.1 d\_Bacteria;p\_Actinobacteriota;c\_Acidimicrobiia;o\_Acidimicrobiales;f\_RAAP-2;g\_RAAP-2;s\_\_

AK5YR.16.metabat2.7 d\_Bacteria;p\_Dormibacterota;c\_Dormibacteria;o\_UBA8260;f\_\_;g\_\_;s\_\_

AK5YR.16.metabat2.11 d\_Bacteria;p\_Actinobacteriota;c\_Actinobacteria;o\_Actinomycetales;f\_Dermatophilaceae;g\_UBA4719;s\_\_

AK5YR.16.metabat2.13 d\_Bacteria;p\_Proteobacteria;c\_Alphaproteobacteria;o\_Rhizobiales;f\_Xanthobacteraceae;g\_Bradyrhizobium;s\_\_

AK5YR.16.metabat2.14 d\_Bacteria;p\_Dormibacterota;c\_Dormibacteria;o\_UBA8260;f\_UBA8260;g\_\_;s\_\_

AK5YR.16.metabat2.17 d\_Bacteria;p\_Dormibacterota;c\_Dormibacteria;o\_UBA8260;f\_UBA8260;g\_\_;s\_\_

AK5YR.16.metabat2.21 d\_Bacteria;p\_Verrucomicrobiota;c\_Verrucomicrobiae;o\_Pedosphaerales;f\_Pedosphaeraceae;g\_UBA11358;s\_\_

AK5YR.16.metabat2.25 d\_Bacteria;p\_Actinobacteriota;c\_Actinobacteria;o\_Actinomycetales;f\_Dermatophilaceae;g\_UBA4719;s\_\_

AK5YR.17.maxbin2.1 d\_Bacteria;p\_Proteobacteria;c\_Alphaproteobacteria;o\_Rhizobiales;f\_Xanthobacteraceae;g\_Pseudolabrys;s\_\_

AK5YR.17.maxbin2.4 d\_Bacteria;p\_UBP10;c\_GR-WP33-30;o\_UBA7539;f\_UBA7539;g\_UBA7539;s\_\_

AK5YR.17.maxbin2.11 d\_Bacteria;p\_Dormibacterota;c\_Dormibacteria;o\_UBA8260;f\_\_;g\_\_;s\_\_

AK5YR.17.maxbin2.16 d\_Bacteria;p\_Acidobacteriota;c\_Acidobacteriae;o\_Acidobacteriales;f\_Acidobacteriaceae;g\_Terracidiphilus;s\_\_

AK5YR.17.metabat2.1 d\_Archaea;p\_Halobacterota;c\_Methanosarcinia;o\_UBA590;f\_UBA590;g\_UBA590;s\_\_

AK5YR.17.metabat2.2 d\_Bacteria;p\_Chloroflexota;c\_Ellin6529;o\_CSP1-4;f\_CSP1-4;g\_\_;s\_\_

AK5YR.17.metabat2.10 d\_Bacteria;p\_Actinobacteriota;c\_Acidimicrobiia;o\_Acidimicrobiales;f\_RAAP-2;g\_RAAP-2;s\_\_

AK5YR.17.metabat2.12 d\_Bacteria;p\_Actinobacteriota;c\_Actinobacteria;o\_Actinomycetales;f\_Dermatophilaceae;g\_UBA4719;s\_

AK5YR.17.metabat2.16 d\_Bacteria;p\_Actinobacteriota;c\_Actinobacteria;o\_Actinomycetales;f\_Dermatophilaceae;g\_UBA4719;s\_

AK5YR.18.maxbin2.8 d\_Bacteria;p\_Actinobacteriota;c\_Actinobacteria;o\_Actinomycetales;f\_Dermatophilaceae;g\_UBA4719;s\_

AK5YR.18.maxbin2.15 d\_Bacteria;p\_Actinobacteriota;c\_Thermoleophilia;o\_20CM-4-69-9;f\_20CM-4-69-9;g\_ ;s\_

AK5YR.18.metabat2.5 d\_Bacteria;p\_Actinobacteriota;c\_Actinobacteria;o\_Actinomycetales;f\_Dermatophilaceae;g\_UBA4719;s\_

AK5YR.18.metabat2.7 d\_Archaea;p\_Halobacterota;c\_Methanosarcinia;o\_UBA590;f\_UBA590;g\_UBA590;s\_

AK5YR.18.metabat2.10 d\_Bacteria;p\_Actinobacteriota;c\_Thermoleophilia;o\_UBA2241;f\_UBA2241;g\_UBA2241;s\_

AK5YR.18.metabat2.19 d\_Bacteria;p\_Proteobacteria;c\_Gammaproteobacteria;o\_Betaproteobacteriales;f\_SG8-39;g\_2-12-FULL-64-23;s\_

AK5YR.18.metabat2.21 d\_Bacteria;p\_Actinobacteriota;c\_Thermoleophilia;o\_Solirubrobacteriales;f\_Solirubrobacteraceae;g\_ ;s\_

AK5YR.19.maxbin2.5 d\_Bacteria;p\_Acidobacteriota;c\_Thermoanaerobaculia;o\_UBA5066;f\_UBA5066;g\_ ;s\_

AK5YR.19.maxbin2.10 d\_Bacteria;p\_Acidobacteriota;c\_Thermoanaerobaculia;o\_UBA5066;f\_UBA5066;g\_ ;s\_

AK5YR.19.maxbin2.18 d\_Bacteria;p\_Desulfobacterota;c\_Syntrophia;o\_Syntrophales;f\_UBA5619;g\_UBA5619;s\_

AK5YR.19.maxbin2.22 d\_Archaea;p\_Halobacterota;c\_Methanosarcinia;o\_Methanosarcinales;f\_Methanoperedenaceae;g\_Methanoperedens;s\_

AK5YR.19.metabat2.8 d\_Bacteria;p\_Proteobacteria;c\_Gammaproteobacteria;o\_Betaproteobacteriales;f\_Gallionellaceae;g\_Gallionella;s\_

AK5YR.19.metabat2.10 d\_Bacteria;p\_Dormibacterota;c\_Dormibacteria;o\_UBA8260;f\_ ;g\_ ;s\_

AK5YR.19.metabat2.14 d\_Archaea;p\_Halobacterota;c\_Methanosarcinia;o\_UBA590;f\_UBA590;g\_UBA590;s\_

AK5YR.19.metabat2.17 d\_Bacteria;p\_Gemmatimonadota;c\_Gemmatimonadetes;o\_Gemmatimonadales;f\_Gemmatimonadaceae;g\_UBA4720;s\_

AK5YR.19.metabat2.21 d\_Bacteria;p\_Proteobacteria;c\_Gammaproteobacteria;o\_Betaproteobacteriales;f\_SG8-39;g\_2-12-FULL-64-23;s\_

AK5YR.19.metabat2.25 d\_Bacteria;p\_Proteobacteria;c\_Alphaproteobacteria;o\_Rhizobiales;f\_Xanthobacteraceae;g\_Pseudolabrys;s\_

AK5YR.19.metabat2.30 d\_Bacteria;p\_Chloroflexota;c\_Ellin6529;o\_CSP1-4;f\_CSP1-4;g\_ ;s\_

AK5YR.20.metabat2.3 d\_Bacteria;p\_Acidobacteriota;c\_Aminicenantia;o\_Aminicenantales;f\_UBA4085;g\_ ;s\_

AK5YR.20.metabat2.7 d\_Bacteria;p\_Desulfobacterota;c\_Syntrophia;o\_Syntrophales;f\_UBA5619;g\_UBA5619;s\_

AK5YR.20.metabat2.9 d\_Bacteria;p\_Proteobacteria;c\_Gammaproteobacteria;o\_Betaproteobacteriales;f\_Gallionellaceae;g\_Sideroxydans;s\_

AK5YR.21.maxbin2.2 d\_Bacteria;p\_Dormibacterota;c\_Dormibacteria;o\_UBA8260;f\_UBA8260;g\_UBA8260;s\_

AK5YR.21.maxbin2.5 d\_Bacteria;p\_Actinobacteriota;c\_Acidimicrobiia;o\_Acidimicrobiales;f\_UBA8190;g\_ ;s\_

AK5YR.21.maxbin2.8 d\_Bacteria;p\_Acidobacteriota;c\_Acidobacteriae;o\_Acidobacteriales;f\_Acidobacteriaceae;g\_Terracidiphilus;s\_

AK5YR.21.maxbin2.18 d\_Bacteria;p\_Gemmatimonadota;c\_Gemmatimonadetes;o\_Gemmatimonadales;f\_Gemmatimonadaceae;g\_UBA4720;s\_

AK5YR.21.metabat2.5 d\_Archaea;p\_Halobacterota;c\_Methanosarcinia;o\_UBA590;f\_UBA590;g\_UBA590;s\_

AK5YR.21.metabat2.8 d\_Bacteria;p\_UBP10;c\_GR-WP33-30;o\_UBA7539;f\_UBA7539;g\_UBA7539;s\_

AK5YR.21.metabat2.10 d\_Bacteria;p\_Proteobacteria;c\_Alphaproteobacteria;o\_Rhizobiales;f\_Xanthobacteraceae;g\_Pseudolabrys;s\_

AK5YR.21.metabat2.11 d\_Archaea;p\_Halobacterota;c\_Methanosarcinia;o\_Methanosarcinales;f\_Methanosarcinaceae;g\_Methanosarcinia;s\_

AK5YR.21.metabat2.13 d\_Bacteria;p\_Actinobacteriota;c\_Actinobacteria;o\_Actinomycetales;f\_Dermatophilaceae;g\_UBA4719;s\_

AK5YR.21.metabat2.14 d\_Bacteria;p\_Actinobacteriota;c\_Acidimicrobiia;o\_Acidimicrobiales;f\_RAAP-2;g\_RAAP-2;s\_

AK5YR.21.metabat2.17 d\_Bacteria;p\_Bacteroidota;c\_Bacteroidia;o\_Chitinophagales;f\_Chitinophagaceae;g\_65-1;s\_

AK5YR.21.metabat2.23 d\_Bacteria;p\_Dormibacterota;c\_Dormibacteria;o\_UBA8260;f\_UBA8260;g\_ ;s\_

AK5YR.21.metabat2.25 d\_Bacteria;p\_Actinobacteriota;c\_Actinobacteria;o\_Actinomycetales;f\_Dermatophilaceae;g\_UBA4719;s\_

AK5YR.22.maxbin2.4 d\_Bacteria;p\_Actinobacteriota;c\_Acidimicrobiia;o\_Acidimicrobiales;f\_UBA8190;g\_ ;s\_

AK5YR.22.metabat2.2 d\_Archaea;p\_Halobacterota;c\_Methanosarcinia;o\_UBA590;f\_UBA590;g\_UBA590;s\_

AK5YR.22.metabat2.5 d\_Bacteria;p\_Acidobacteriota;c\_Acidobacteriae;o\_Acidobacteriales;f\_Acidobacteriaceae;g\_Terracidiphilus;s\_

AK5YR.22.metabat2.9 d\_Bacteria;p\_Proteobacteria;c\_Gammaproteobacteria;o\_Betaproteobacteriales;f\_SG8-39;g\_2-12-FULL-64-23;s\_

AK5YR.22.metabat2.11 d\_Bacteria;p\_UBP10;c\_GR-WP33-30;o\_UBA7539;f\_UBA7539;g\_UBA7539;s\_

AK5YR.22.metabat2.12 d\_Bacteria;p\_Bacteroidota;c\_Bacteroidia;o\_Bacteroidales;f\_vadinHA17;g\_LD21;s\_

AK5YR.22.metabat2.14 d\_Bacteria;p\_Gemmatimonadota;c\_Gemmatimonadetes;o\_Gemmatimonadales;f\_Gemmatimonadaceae;g\_ ;s\_

AK5YR.22.metabat2.16 d\_Bacteria;p\_Patescibacteria;c\_Microgenomatia;o\_Levybacteriales;f\_UBA12049;g\_ ;s\_

AK5YR.22.metabat2.18 d\_Bacteria;p\_Chloroflexota;c\_Ellin6529;o\_CSP1-4;f\_CSP1-4;g\_ ;s\_

AK5YR.23.maxbin2.5 d\_Bacteria;p\_Actinobacteriota;c\_Acidimicrobiia;o\_Acidimicrobiales;f\_UBA8190;g\_ ;s\_

AK5YR.23.maxbin2.8 d\_Bacteria;p\_Actinobacteriota;c\_Actinobacteria;o\_Actinomycetales;f\_Dermatophilaceae;g\_UBA4719;s\_

AK5YR.23.maxbin2.10 d\_Archaea;p\_Halobacterota;c\_Methanosarcinia;o\_UBA590;f\_UBA590;g\_UBA590;s\_

AK5YR.23.metabat2.1 d\_Bacteria;p\_UBP10;c\_GR-WP33-30;o\_UBA7539;f\_UBA7539;g\_UBA7539;s\_

AK5YR.23.metabat2.4 d\_Bacteria;p\_Dormibacterota;c\_Dormibacteria;o\_UBA8260;f\_UBA8260;g\_ ;s\_

|                      |                                                                                                                |
|----------------------|----------------------------------------------------------------------------------------------------------------|
| AK5YR.23.metabat2.5  | d__Bacteria;p__Proteobacteria;c__Alphaproteobacteria;o__Rhizobiales;f__Xanthobacteraceae;g__Pseudolabrys;s__   |
| AK5YR.23.metabat2.11 | d__Bacteria;p__Proteobacteria;c__Gammaproteobacteria;o__Betaproteobacteriales;f__SG8-39;g__2-12-FULL-64-23;s__ |
| AK5YR.24.maxbin2.9   | d__Archaea;p__Halobacterota;c__Methanosarcinia;o__UBA590;f__UBA590;g__UBA590;s__                               |
| AK5YR.24.maxbin2.14  | d__Archaea;p__Halobacterota;c__Methanosarcinia;o__UBA590;f__UBA590;g__UBA590;s__                               |
| AK5YR.24.maxbin2.15  | d__Bacteria;p__Bacteroidota;c__Bacteroidia;o__Chitinophagales;f__Chitinophagaceae;g__65-1;s__                  |
| AK5YR.24.maxbin2.17  | d__Bacteria;p__Dormibacterota;c__Dormibacteria;o__UBA8260;f__g__s__                                            |
| AK5YR.24.metabat2.6  | d__Bacteria;p__Acidobacteriota;c__Thermoanaerobaculia;o__UBA5066;f__UBA5066;g__s__                             |
| AK5YR.24.metabat2.9  | d__Bacteria;p__Proteobacteria;c__Gammaproteobacteria;o__Betaproteobacteriales;f__SG8-39;g__2-12-FULL-64-23;s__ |
| AK5YR.24.metabat2.15 | d__Bacteria;p__Proteobacteria;c__Alphaproteobacteria;o__Rhizobiales;f__Xanthobacteraceae;g__Pseudolabrys;s__   |

**Table S5: Taxonomic classifications of metagenome-assembled genomes (MAGs) derived from Microbial Genome Atlas (MiGA), and MAG European Nucleotide Archive (ENA) accession IDs.**

| MAG ID              | Accession ID | MiGA taxonomic classification                                                |
|---------------------|--------------|------------------------------------------------------------------------------|
| AK5YR.2.maxbin2.1   | ERZ908899    | d:Bacteria p:Acidobacteria c:Acidobacteriia                                  |
| AK5YR.2.maxbin2.7   | ERZ908986    | d:Bacteria p:Firmicutes                                                      |
| AK5YR.2.maxbin2.12  | ERZ908985    | d:Bacteria p:Actinobacteria c:Actinobacteria                                 |
| AK5YR.2.metabat2.9  | ERZ908991    | d:Bacteria p:Firmicutes                                                      |
| AK5YR.2.metabat2.12 | ERZ908987    | d:Bacteria p:Firmicutes                                                      |
| AK5YR.2.metabat2.14 | ERZ908988    | d:Bacteria p:Proteobacteria c:Gammaproteobacteria                            |
| AK5YR.2.metabat2.17 | ERZ908989    | d:Bacteria p:Actinobacteria                                                  |
| AK5YR.2.metabat2.25 | ERZ908990    | d:Bacteria p:Acidobacteria c:Solibacteres o:Solibacterales f:Solibacteraceae |
| AK5YR.3.maxbin2.1   | ERZ909031    | d:Bacteria p:Acidobacteria c:Acidobacteriia                                  |
| AK5YR.3.maxbin2.4   | ERZ909033    | d:Bacteria p:Acidobacteria c:Acidobacteriia                                  |
| AK5YR.3.maxbin2.10  | ERZ909032    | d:Bacteria p:Firmicutes                                                      |
| AK5YR.3.metabat2.3  | ERZ909034    | d:Bacteria p:Firmicutes                                                      |
| AK5YR.3.metabat2.5  | ERZ909035    | d:Bacteria p:Acidobacteria c:Solibacteres o:Solibacterales f:Solibacteraceae |
| AK5YR.4.maxbin2.1   | ERZ909036    | d:Bacteria p:Acidobacteria c:Acidobacteriia                                  |
| AK5YR.4.maxbin2.3   | ERZ909038    | d:Bacteria p:Proteobacteria c:Gammaproteobacteria                            |
| AK5YR.4.maxbin2.8   | ERZ909039    | d:Bacteria p:Actinobacteria c:Actinobacteria                                 |
| AK5YR.4.maxbin2.13  | ERZ909037    | d:Bacteria p:Actinobacteria                                                  |
| AK5YR.4.metabat2.3  | ERZ909043    | d:Bacteria p:Acidobacteria c:Acidobacteriia                                  |
| AK5YR.4.metabat2.8  | ERZ909044    | d:Bacteria p:Acidobacteria c:Solibacteres o:Solibacterales f:Solibacteraceae |
| AK5YR.4.metabat2.13 | ERZ909040    | d:Bacteria p:Firmicutes                                                      |
| AK5YR.4.metabat2.14 | ERZ909041    | d:Bacteria p:Acidobacteria c:Acidobacteriia                                  |
| AK5YR.4.metabat2.16 | ERZ909042    | d:Bacteria p:Firmicutes                                                      |
| AK5YR.5.maxbin2.5   | ERZ909046    | d:Bacteria p:Acidobacteria c:Acidobacteriia                                  |
| AK5YR.5.maxbin2.6   | ERZ909047    | d:Bacteria p:Firmicutes                                                      |
| AK5YR.5.maxbin2.16  | ERZ909045    | d:Bacteria p:Acidobacteria c:Solibacteres o:Solibacterales f:Solibacteraceae |
| AK5YR.5.metabat2.1  | ERZ909048    | d:Bacteria p:Acidobacteria c:Acidobacteriia                                  |
| AK5YR.5.metabat2.5  | ERZ909058    | d:Bacteria p:Acidobacteria c:Acidobacteriia                                  |
| AK5YR.5.metabat2.13 | ERZ909049    | d:Bacteria p:Actinobacteria c:Thermoleophilia                                |
| AK5YR.5.metabat2.15 | ERZ909050    | d:Bacteria p:Actinobacteria c:Acidimicrobiia                                 |

|                      |           |                                                                                       |
|----------------------|-----------|---------------------------------------------------------------------------------------|
| AK5YR.5.metabat2.16  | ERZ909051 | d:Bacteria p:Proteobacteria c:Gammaproteobacteria                                     |
| AK5YR.5.metabat2.17  | ERZ909052 | d:Bacteria p:Proteobacteria c:Betaproteobacteria o:Nitrosomonadales f:Gallionellaceae |
| AK5YR.5.metabat2.26  | ERZ909053 | d:Bacteria p:Acidobacteria c:Acidobacteriia                                           |
| AK5YR.5.metabat2.27  | ERZ909054 | d:Bacteria p:Proteobacteria c:Gammaproteobacteria                                     |
| AK5YR.5.metabat2.28  | ERZ909055 | d:Bacteria p:Actinobacteria                                                           |
| AK5YR.5.metabat2.29  | ERZ909056 | d:Bacteria p:Proteobacteria                                                           |
| AK5YR.5.metabat2.32  | ERZ909057 | d:Bacteria p:Firmicutes                                                               |
| AK5YR.6.metabat2.1   | ERZ909059 | d:Bacteria p:Actinobacteria c:Actinobacteria                                          |
| AK5YR.6.metabat2.3   | ERZ909060 | d:Bacteria p:Firmicutes                                                               |
| AK5YR.7.maxbin2.1    | ERZ909061 | d:Bacteria p:Acidobacteria c:Acidobacteriia                                           |
| AK5YR.7.maxbin2.8    | ERZ909062 | d:Bacteria p:Actinobacteria c:Actinobacteria                                          |
| AK5YR.7.metabat2.1   | ERZ909063 | d:Bacteria p:Verrucomicrobia c:Verrucomicrobiae                                       |
| AK5YR.7.metabat2.7   | ERZ909064 | d:Bacteria p:Proteobacteria c:Gammaproteobacteria                                     |
| AK5YR.7.metabat2.9   | ERZ909065 | d:Bacteria p:Actinobacteria c:Actinobacteria                                          |
| AK5YR.8.maxbin2.3    | ERZ909066 | d:Bacteria p:Proteobacteria c:Betaproteobacteria o:Nitrosomonadales f:Gallionellaceae |
| AK5YR.8.metabat2.9   | ERZ909067 | d:Bacteria p:Firmicutes                                                               |
| AK5YR.9.maxbin2.2    | ERZ909070 | d:Bacteria p:Acidobacteria c:Acidobacteriia                                           |
| AK5YR.9.maxbin2.7    | ERZ909071 | d:Bacteria p:Actinobacteria c:Acidimicrobiia                                          |
| AK5YR.9.maxbin2.16   | ERZ909069 | d:Bacteria p:Actinobacteria                                                           |
| AK5YR.9.metabat2.11  | ERZ909072 | d:Bacteria p:Proteobacteria c:Gammaproteobacteria                                     |
| AK5YR.9.metabat2.13  | ERZ909073 | d:Bacteria p:Acidobacteria c:Solibacteres                                             |
| AK5YR.9.metabat2.14  | ERZ909074 | d:Bacteria p:Acidobacteria c:Solibacteres o:Solibacterales f:Solibacteraceae          |
| AK5YR.9.metabat2.26  | ERZ909075 | d:Bacteria p:Actinobacteria c:Actinobacteria                                          |
| AK5YR.9.metabat2.30  | ERZ909076 | d:Bacteria p:Actinobacteria c:Actinobacteria                                          |
| AK5YR.11.maxbin2.4   | ERZ908903 | d:Bacteria p:Acidobacteria c:Acidobacteriia                                           |
| AK5YR.11.metabat2.10 | ERZ908904 | d:Bacteria p:Proteobacteria c:Gammaproteobacteria                                     |
| AK5YR.12.maxbin2.1   | ERZ908905 | d:Bacteria p:Acidobacteria c:Acidobacteriia                                           |
| AK5YR.12.maxbin2.3   | ERZ908908 | d:Bacteria p:Proteobacteria c:Gammaproteobacteria                                     |
| AK5YR.12.maxbin2.7   | ERZ908910 | d:Bacteria p:Actinobacteria                                                           |
| AK5YR.12.maxbin2.9   | ERZ908911 | d:Bacteria p:Firmicutes                                                               |
| AK5YR.12.maxbin2.14  | ERZ908906 | d:Bacteria p:Actinobacteria c:Actinobacteria                                          |
| AK5YR.12.maxbin2.17  | ERZ908907 | d:Bacteria p:Actinobacteria c:Thermoleophilia                                         |
| AK5YR.12.maxbin2.30  | ERZ908909 | d:Bacteria p:Firmicutes                                                               |
| AK5YR.12.metabat2.2  | ERZ908913 | d:Bacteria p:Acidobacteria c:Acidobacteriia                                           |
| AK5YR.12.metabat2.5  | ERZ908917 | d:Bacteria p:Firmicutes                                                               |
| AK5YR.12.metabat2.18 | ERZ908912 | d:Bacteria p:Acidobacteria c:Acidobacteriia                                           |
| AK5YR.12.metabat2.20 | ERZ908914 | d:Bacteria p:Actinobacteria c:Acidimicrobiia                                          |
| AK5YR.12.metabat2.34 | ERZ908915 | d:Bacteria p:Acidobacteria c:Solibacteres o:Solibacterales f:Solibacteraceae          |
| AK5YR.12.metabat2.37 | ERZ908916 | d:Bacteria p:Acidobacteria c:Acidobacteriia                                           |
| AK5YR.13.maxbin2.4   | ERZ908918 | d:Bacteria p:Actinobacteria c:Acidimicrobiia                                          |
| AK5YR.13.maxbin2.9   | ERZ908919 | d:Bacteria p:Firmicutes                                                               |
| AK5YR.13.metabat2.1  | ERZ908920 | d:Bacteria p:Bacteroidetes c:Chitinophagia                                            |
| AK5YR.13.metabat2.2  | ERZ908923 | d:Bacteria p:Gemmatimonadetes c:Gemmatimonadetes                                      |
| AK5YR.13.metabat2.4  | ERZ908924 | d:Bacteria p:Chloroflexi                                                              |
| AK5YR.13.metabat2.6  | ERZ908925 | d:Bacteria p:Firmicutes                                                               |
| AK5YR.13.metabat2.10 | ERZ908921 | d:Bacteria p:Proteobacteria                                                           |
| AK5YR.13.metabat2.12 | ERZ908922 | d:Bacteria p:Proteobacteria c:Alphaproteobacteria o:Rhizobiales                       |
| AK5YR.14.maxbin2.1   | ERZ908926 | d:Bacteria p:Proteobacteria c:Alphaproteobacteria o:Rhizobiales                       |
| AK5YR.14.maxbin2.11  | ERZ908927 | d:Bacteria p:Firmicutes                                                               |
| AK5YR.14.maxbin2.12  | ERZ908928 | d:Bacteria p:Chloroflexi                                                              |

|                      |           |                                                                                                      |
|----------------------|-----------|------------------------------------------------------------------------------------------------------|
| AK5YR.14.maxbin2.15  | ERZ908929 | d:Archaea p:Euryarchaeota c:Methanomicrobia                                                          |
| AK5YR.14.maxbin2.17  | ERZ908930 | d:Bacteria p:Bacteroidetes c:Chitinophagia                                                           |
| AK5YR.14.metabat2.1  | ERZ908931 | d:Bacteria p:Proteobacteria c:Betaproteobacteria                                                     |
| AK5YR.14.metabat2.3  | ERZ908936 | d:Bacteria p:Firmicutes                                                                              |
| AK5YR.14.metabat2.12 | ERZ908932 | d:Bacteria p:Actinobacteria c:Actinobacteria o:Micrococcales f:Intrasporangiaceae                    |
| AK5YR.14.metabat2.16 | ERZ908933 | d:Bacteria p:Acidobacteria                                                                           |
| AK5YR.14.metabat2.17 | ERZ908934 | d:Bacteria p:Proteobacteria c:Betaproteobacteria o:Nitrosomonadales f:Gallionellaceae                |
| AK5YR.14.metabat2.18 | ERZ908935 | d:Bacteria p:Proteobacteria                                                                          |
| AK5YR.15.maxbin2.16  | ERZ908937 | d:Bacteria p:Firmicutes                                                                              |
| AK5YR.15.metabat2.4  | ERZ908944 | d:Bacteria p:Actinobacteria c:Actinobacteria o:Micrococcales f:Intrasporangiaceae                    |
| AK5YR.15.metabat2.11 | ERZ908938 | d:Bacteria p:Bacteroidetes c:Chitinophagia                                                           |
| AK5YR.15.metabat2.12 | ERZ908939 | d:Bacteria p:Firmicutes                                                                              |
| AK5YR.15.metabat2.13 | ERZ908940 | d:Archaea p:Euryarchaeota c:Methanomicrobia                                                          |
| AK5YR.15.metabat2.14 | ERZ908941 | d:Bacteria p:Actinobacteria c:Thermoleophilia                                                        |
| AK5YR.15.metabat2.16 | ERZ908942 | d:Bacteria p:Actinobacteria                                                                          |
| AK5YR.15.metabat2.20 | ERZ908943 | d:Bacteria p:Acidobacteria c:Solibacteres o:Solibacterales f:Solibacteraceae                         |
| AK5YR.16.maxbin2.1   | ERZ908945 | d:Bacteria p:Proteobacteria c:Alphaproteobacteria o:Rhizobiales                                      |
| AK5YR.16.maxbin2.3   | ERZ908948 | d:Bacteria p:Firmicutes                                                                              |
| AK5YR.16.maxbin2.10  | ERZ908946 | d:Bacteria p:Acidobacteria c:Acidobacteriia                                                          |
| AK5YR.16.maxbin2.17  | ERZ908947 | d:Archaea p:Euryarchaeota c:Methanomicrobia                                                          |
| AK5YR.16.metabat2.1  | ERZ908949 | d:Bacteria p:Actinobacteria                                                                          |
| AK5YR.16.metabat2.7  | ERZ908956 | d:Bacteria p:Firmicutes                                                                              |
| AK5YR.16.metabat2.11 | ERZ908950 | d:Bacteria p:Actinobacteria c:Actinobacteria o:Micrococcales f:Intrasporangiaceae                    |
| AK5YR.16.metabat2.13 | ERZ908951 | d:Bacteria p:Proteobacteria c:Alphaproteobacteria o:Rhizobiales f:Bradyrhizobiaceae g:Bradyrhizobium |
| AK5YR.16.metabat2.14 | ERZ908952 | d:Bacteria p:Firmicutes                                                                              |
| AK5YR.16.metabat2.17 | ERZ908953 | d:Bacteria p:Firmicutes                                                                              |
| AK5YR.16.metabat2.21 | ERZ908954 | d:Bacteria p:Verrucomicrobia                                                                         |
| AK5YR.16.metabat2.25 | ERZ908955 | d:Bacteria p:Actinobacteria c:Actinobacteria o:Micrococcales f:Intrasporangiaceae                    |
| AK5YR.17.maxbin2.1   | ERZ908957 | d:Bacteria p:Proteobacteria c:Alphaproteobacteria o:Rhizobiales                                      |
| AK5YR.17.maxbin2.4   | ERZ908960 | d:Bacteria p:Proteobacteria                                                                          |
| AK5YR.17.maxbin2.11  | ERZ908958 | d:Bacteria p:Firmicutes                                                                              |
| AK5YR.17.maxbin2.16  | ERZ908959 | d:Bacteria p:Acidobacteria c:Acidobacteriia                                                          |
| AK5YR.17.metabat2.1  | ERZ908961 | d:Archaea p:Euryarchaeota c:Methanomicrobia                                                          |
| AK5YR.17.metabat2.2  | ERZ908965 | d:Bacteria p:Chloroflexi                                                                             |
| AK5YR.17.metabat2.10 | ERZ908962 | d:Bacteria p:Actinobacteria                                                                          |
| AK5YR.17.metabat2.12 | ERZ908963 | d:Bacteria p:Actinobacteria c:Actinobacteria                                                         |
| AK5YR.17.metabat2.16 | ERZ908964 | d:Bacteria p:Actinobacteria c:Actinobacteria o:Micrococcales f:Intrasporangiaceae                    |
| AK5YR.18.maxbin2.8   | ERZ908967 | d:Bacteria p:Actinobacteria c:Actinobacteria o:Micrococcales f:Intrasporangiaceae                    |
| AK5YR.18.maxbin2.15  | ERZ908966 | d:Bacteria p:Firmicutes                                                                              |
| AK5YR.18.metabat2.5  | ERZ908971 | d:Bacteria p:Actinobacteria c:Actinobacteria o:Micrococcales f:Intrasporangiaceae                    |
| AK5YR.18.metabat2.7  | ERZ908972 | d:Archaea p:Euryarchaeota c:Methanomicrobia                                                          |
| AK5YR.18.metabat2.10 | ERZ908968 | d:Bacteria p:Firmicutes                                                                              |
| AK5YR.18.metabat2.19 | ERZ908969 | d:Bacteria p:Proteobacteria c:Betaproteobacteria                                                     |
| AK5YR.18.metabat2.21 | ERZ908970 | d:Bacteria p:Actinobacteria c:Thermoleophilia                                                        |
| AK5YR.19.maxbin2.5   | ERZ908976 | d:Bacteria p:Acidobacteria                                                                           |
| AK5YR.19.maxbin2.10  | ERZ908973 | d:Bacteria p:Firmicutes                                                                              |
| AK5YR.19.maxbin2.18  | ERZ908974 | d:Bacteria p:Proteobacteria c:Deltaproteobacteria                                                    |
| AK5YR.19.maxbin2.22  | ERZ908975 | d:Archaea p:Euryarchaeota c:Methanomicrobia                                                          |
| AK5YR.19.metabat2.8  | ERZ908984 | d:Bacteria p:Proteobacteria c:Betaproteobacteria o:Nitrosomonadales f:Gallionellaceae                |
| AK5YR.19.metabat2.10 | ERZ908977 | d:Bacteria p:Firmicutes                                                                              |

|                      |           |                                                                                                      |
|----------------------|-----------|------------------------------------------------------------------------------------------------------|
| AK5YR.19.metabat2.14 | ERZ908978 | d:Archaea p:Euryarchaeota c:Methanomicrobia                                                          |
| AK5YR.19.metabat2.17 | ERZ908979 | d:Bacteria p:Gemmatimonadetes c:Gemmatimonadetes                                                     |
| AK5YR.19.metabat2.21 | ERZ908981 | d:Bacteria p:Proteobacteria c:Betaproteobacteria                                                     |
| AK5YR.19.metabat2.25 | ERZ908982 | d:Bacteria p:Proteobacteria c:Alphaproteobacteria o:Rhizobiales f:Hyphomicrobiaceae                  |
| AK5YR.19.metabat2.30 | ERZ908983 | d:Bacteria p:Firmicutes                                                                              |
| AK5YR.20.metabat2.3  | ERZ908992 | d:Bacteria                                                                                           |
| AK5YR.20.metabat2.7  | ERZ908993 | d:Bacteria p:Proteobacteria c:Deltaproteobacteria                                                    |
| AK5YR.20.metabat2.9  | ERZ908994 | d:Bacteria p:Proteobacteria c:Betaproteobacteria o:Nitrosomonadales f:Gallionellaceae g:Sideroxydans |
| AK5YR.21.maxbin2.2   | ERZ908996 | d:Bacteria p:Firmicutes                                                                              |
| AK5YR.21.maxbin2.5   | ERZ908997 | d:Bacteria p:Actinobacteria                                                                          |
| AK5YR.21.maxbin2.8   | ERZ908998 | d:Bacteria p:Acidobacteria c:Acidobacteriia                                                          |
| AK5YR.21.maxbin2.18  | ERZ908995 | d:Bacteria p:Gemmatimonadetes c:Gemmatimonadetes                                                     |
| AK5YR.21.metabat2.5  | ERZ909006 | d:Archaea p:Euryarchaeota c:Methanomicrobia                                                          |
| AK5YR.21.metabat2.8  | ERZ909007 | d:Bacteria p:Proteobacteria                                                                          |
| AK5YR.21.metabat2.10 | ERZ908999 | d:Bacteria p:Proteobacteria c:Alphaproteobacteria o:Rhizobiales                                      |
| AK5YR.21.metabat2.11 | ERZ909000 | d:Archaea p:Euryarchaeota c:Methanomicrobia o:Methanosarcinales f:Methanosarcinaceae                 |
| AK5YR.21.metabat2.13 | ERZ909001 | d:Bacteria p:Actinobacteria c:Actinobacteria o:Micrococcales f:Intrasporangiaceae                    |
| AK5YR.21.metabat2.14 | ERZ909002 | d:Bacteria p:Actinobacteria                                                                          |
| AK5YR.21.metabat2.17 | ERZ909003 | d:Bacteria p:Bacteroidetes c:Chitinophagia                                                           |
| AK5YR.21.metabat2.23 | ERZ909004 | d:Bacteria p:Firmicutes                                                                              |
| AK5YR.21.metabat2.25 | ERZ909005 | d:Bacteria p:Actinobacteria c:Actinobacteria o:Micrococcales f:Intrasporangiaceae                    |
| AK5YR.22.maxbin2.4   | ERZ909008 | d:Bacteria p:Actinobacteria                                                                          |
| AK5YR.22.metabat2.2  | ERZ909014 | d:Archaea p:Euryarchaeota c:Methanomicrobia                                                          |
| AK5YR.22.metabat2.5  | ERZ909015 | d:Bacteria p:Acidobacteria c:Acidobacteriia                                                          |
| AK5YR.22.metabat2.9  | ERZ909016 | d:Bacteria p:Proteobacteria c:Betaproteobacteria                                                     |
| AK5YR.22.metabat2.11 | ERZ909009 | d:Bacteria p:Proteobacteria                                                                          |
| AK5YR.22.metabat2.12 | ERZ909010 | d:Bacteria p:Bacteroidetes c:Bacteroidia                                                             |
| AK5YR.22.metabat2.14 | ERZ909011 | d:Bacteria                                                                                           |
| AK5YR.22.metabat2.16 | ERZ909012 | d:Bacteria                                                                                           |
| AK5YR.22.metabat2.18 | ERZ909013 | d:Bacteria p:Firmicutes                                                                              |
| AK5YR.23.maxbin2.5   | ERZ909018 | d:Bacteria p:Actinobacteria c:Acidimicrobiia                                                         |
| AK5YR.23.maxbin2.8   | ERZ909019 | d:Bacteria p:Actinobacteria c:Actinobacteria o:Micrococcales f:Intrasporangiaceae                    |
| AK5YR.23.maxbin2.10  | ERZ909017 | d:Archaea p:Euryarchaeota c:Methanomicrobia                                                          |
| AK5YR.23.metabat2.1  | ERZ909020 | d:Bacteria p:Firmicutes                                                                              |
| AK5YR.23.metabat2.4  | ERZ909022 | d:Bacteria p:Firmicutes                                                                              |
| AK5YR.23.metabat2.5  | ERZ909023 | d:Bacteria p:Proteobacteria c:Alphaproteobacteria o:Rhizobiales                                      |
| AK5YR.23.metabat2.11 | ERZ909021 | d:Bacteria p:Proteobacteria c:Betaproteobacteria                                                     |
| AK5YR.24.maxbin2.9   | ERZ909027 | d:Archaea p:Euryarchaeota c:Methanomicrobia                                                          |
| AK5YR.24.maxbin2.14  | ERZ909024 | d:Archaea p:Euryarchaeota c:Methanomicrobia                                                          |
| AK5YR.24.maxbin2.15  | ERZ909025 | d:Bacteria p:Bacteroidetes c:Chitinophagia o:Chitinophagales                                         |
| AK5YR.24.maxbin2.17  | ERZ909026 | d:Bacteria p:Firmicutes                                                                              |
| AK5YR.24.metabat2.6  | ERZ909029 | d:Bacteria p:Firmicutes                                                                              |
| AK5YR.24.metabat2.9  | ERZ909030 | d:Bacteria p:Proteobacteria c:Betaproteobacteria                                                     |
| AK5YR.24.metabat2.15 | ERZ909028 | d:Bacteria p:Proteobacteria c:Alphaproteobacteria o:Rhizobiales                                      |

## Supplemental figures

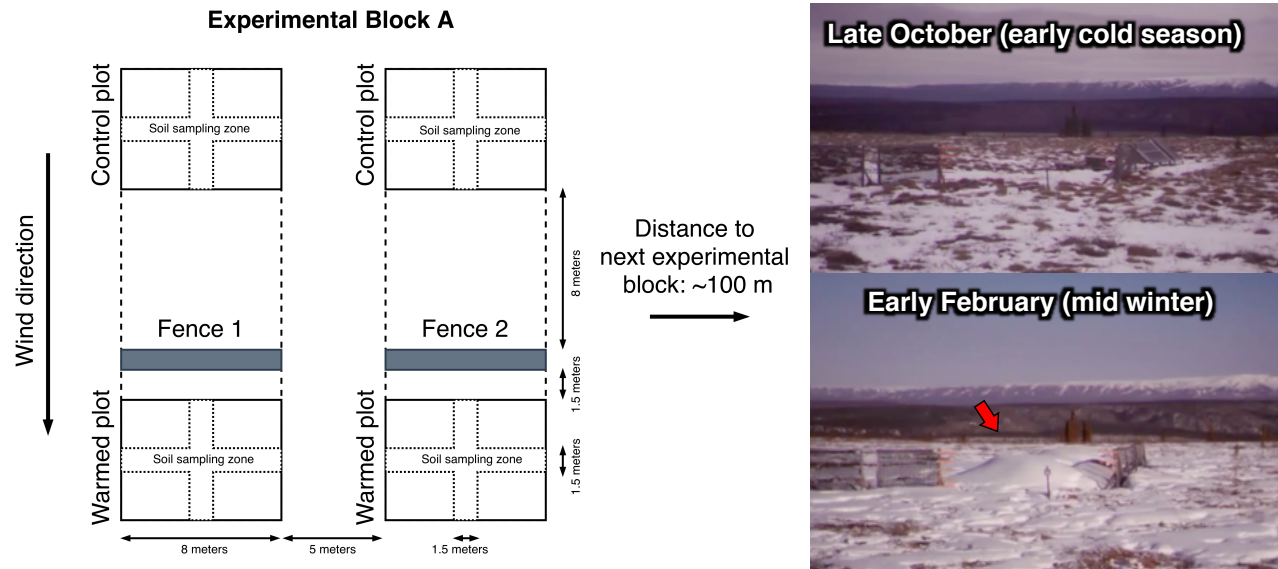

**Figure S1: Example diagram of experimental blocks at the CiPEHR experimental warming site in Alaska, USA and photographs demonstrating snow accumulation that occurs during winter months.** Diagram (left) represents an example of one of three experimental blocks. Each of the three experimental blocks were separated by at least 100 meters. Snow fence images were taken in October 2012 and February 2013.



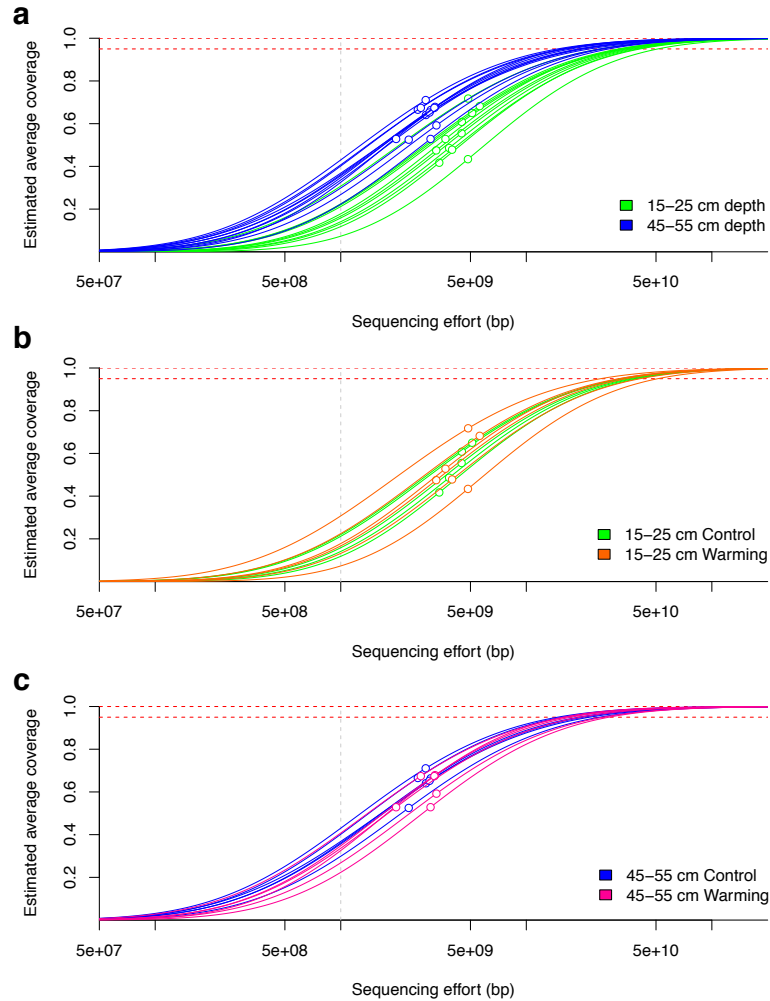

**Figure S2: Curves representing soil microbial community complexity as determined by Nonpareil.** Nonpareil is a statistical tool that uses read redundancy to estimate metagenome dataset complexity and the amount of sequencing effort needed to achieve a desired level of coverage (Rodriguez-R *et al.*, 2018). Different plots are shown to compare (a) all 5-year sample metagenomes, (b) 15-25 cm sample metagenomes only, and (c) 45-55 cm sample metagenomes only. Circles on curves represent the coverage of the actual sequencing depth for each dataset in relation to the entire curve (projection for complete coverage after the circle). Curves positioned on the right represent more sequence diverse metagenomes than curves positioned on the left.

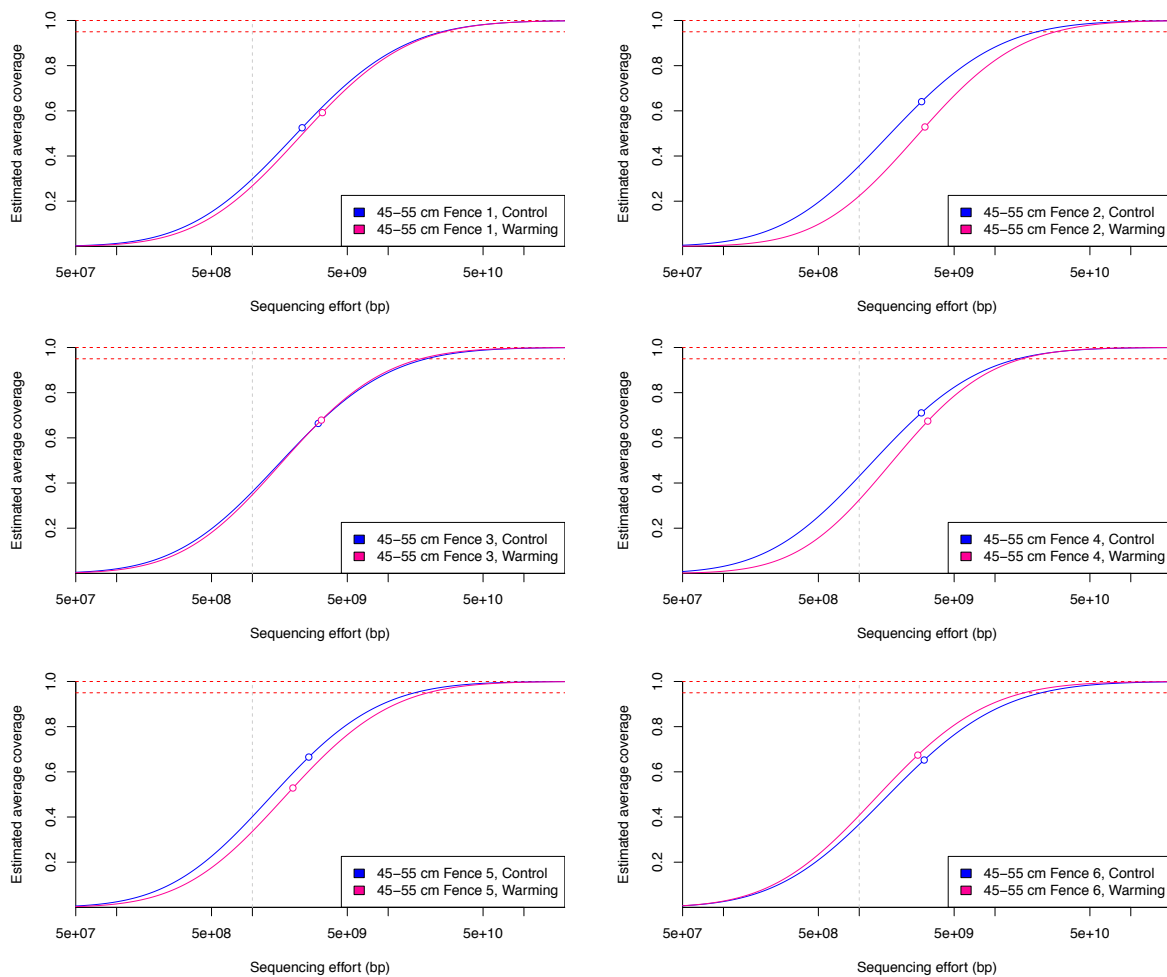

**Figure S3: Curves representing pairwise comparisons of warmed and unwarmed soil communities after 4.5 years of experimentation at 45-55 cm.** Each plot shows the differences between warmed and unwarmed samples corresponding to the six different fences (i.e., experimental plots). See Figure S1 legend for additional details.

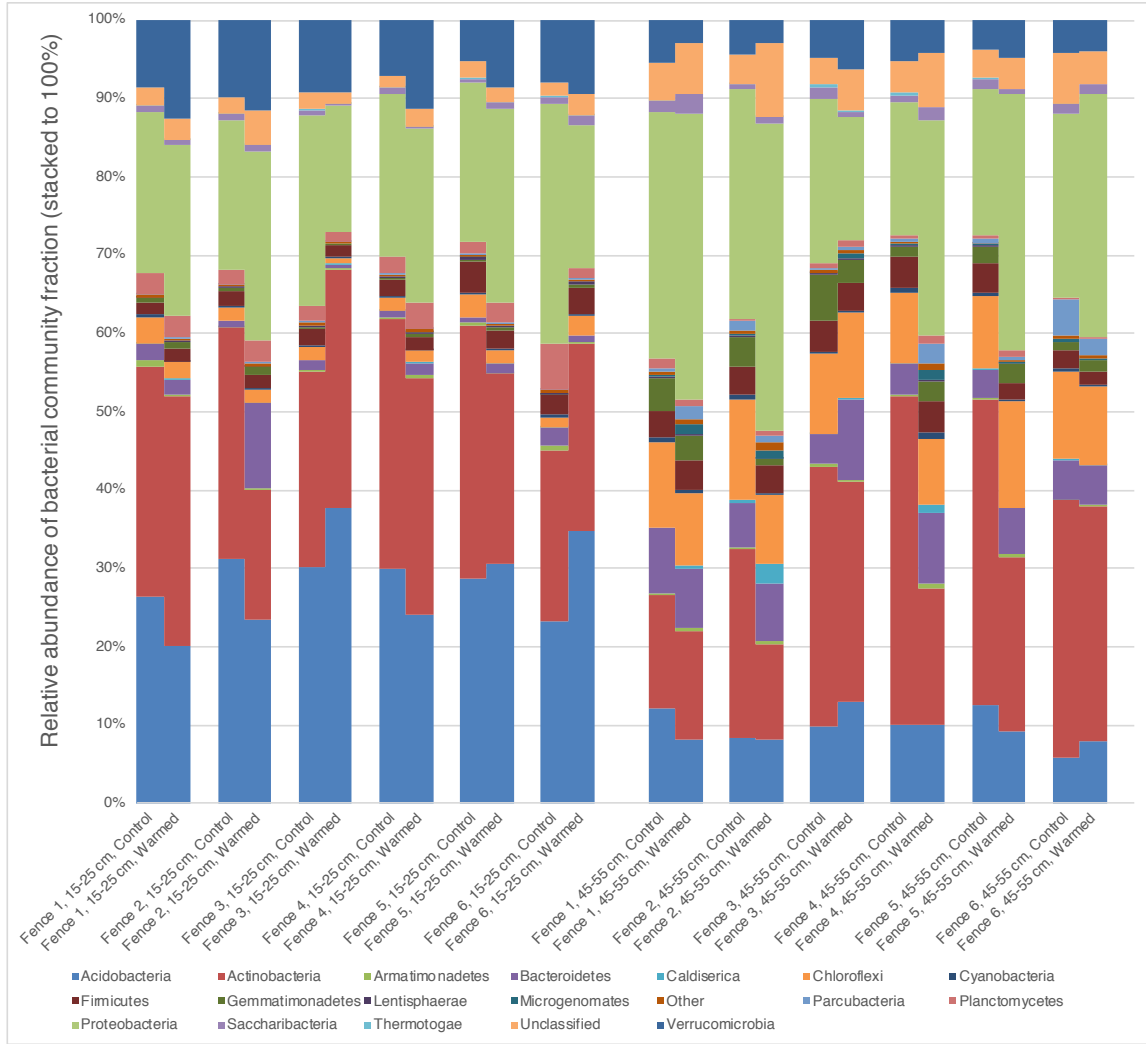

**Figure S4: Bacterial community phylum-level composition for 4.5-year sample metagenomes.** Underlying data is based on 16S rRNA gene-encoding fragments recovered from metagenomic datasets processed with Parallel-META version 2. Values represent the abundance of each bacterial phylum as a proportion of the total bacterial community. Only bacterial phyla with a mean relative abundance  $\geq 0.1\%$  are shown.

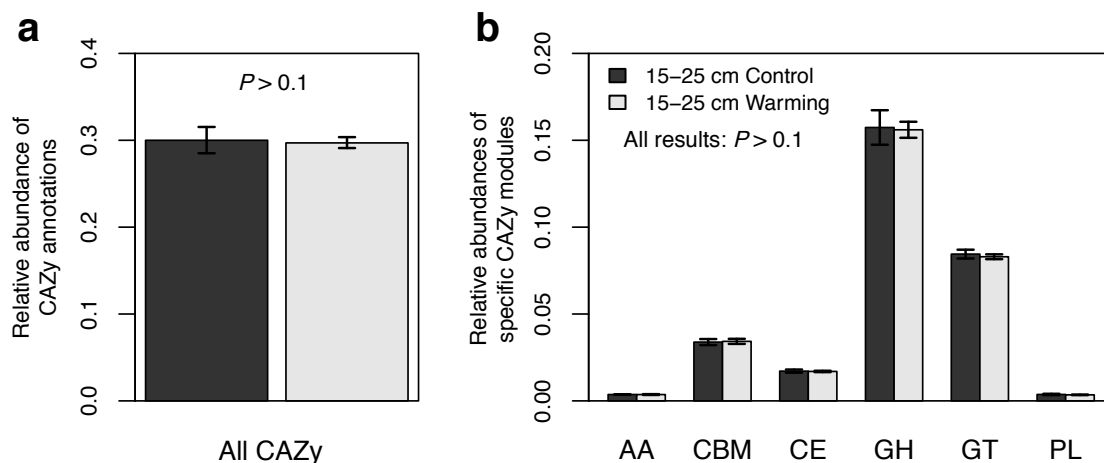

**Figure S5: Shifts in carbohydrate utilization (CAZy) genes as an effect of experimental warming after 1.5 years.** Relative abundances of (a) all CAZy annotations, and (b) CAZy modules: Auxiliary Activities (AA), Carbohydrate Binding (CBM), Carbohydrate Esterases (CE), Glycoside Hydrolases (GH), GlycosylTransferases (GT), and Polysaccharide Lyases (PL). Underlying values represent the mean relative abundance of each category for warmed vs. unwarmed soils. The abundances of CAZy functions were determined by normalizing the number of annotations matching to each broad definition by the number of annotations matching to the more comprehensive SwissProt database

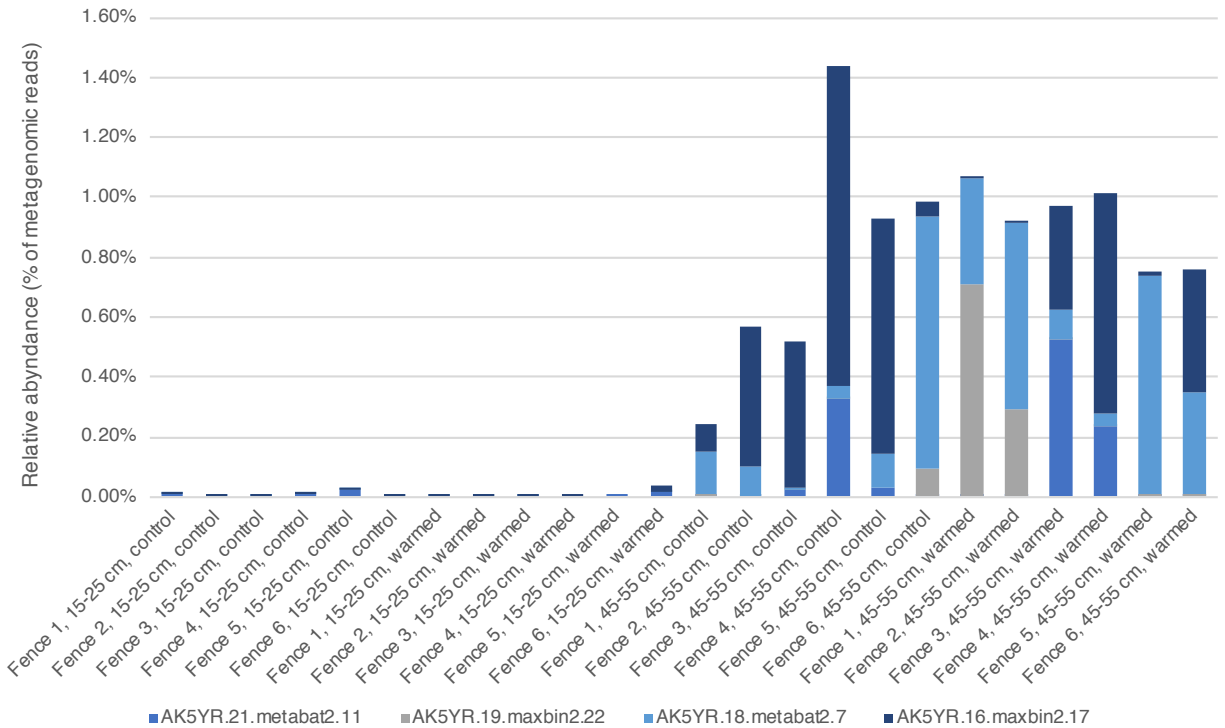

**Figure S6. Sequence-based abundances of archaeal metagenome-assembled genomes (MAGs) in 4.5-year Alaskan tundra metagenomes determined by read mapping.** Results were obtained by the number of sequences that matched MAG contigs (using a default megablast search) at  $\geq 100$  bp and  $\geq 97\%$  nucleotide, divided by the number of reads used as query. Note: Although 13 archaeal MAGs were recovered in total, they were de-replicated into four that were non-redundant (see materials and methods for de-replication procedure). For each non-redundant MAG, the version with the highest quality score (Calculated as completeness (from CheckM) – 5 \* contamination (also from CheckM)) (Parks et al., 2017) was used for read mapping.

AK5YR.21.metabat2.11  
**MiGA:** *Methanosarcina barkeri* 3 NZ CP009517 (72.95% AAI)  
**GTDB-Tk:** p\_Halobacterota; c\_Methanosarcinia;  
 o\_Methanosarcinales; f\_Methanosarcinaceae;  
 g\_Methanosarcinia; s\_ (75.25% AAI to GCA\_001714685.2)  
 AK5YR.19.maxbin2.22  
**MiGA:** *Methanosarcina mazei* Tuc01 CP004144 (49.78% AAI)  
**GTDB-Tk:** p\_Halobacterota; c\_Methanosarcinia;  
 o\_Methanosarcinales; f\_Methanoperedonaceae;  
 g\_Methanoperedens; s\_ (82.17% AAI to GCF\_002487355.1)

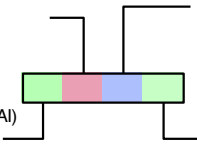

AK5YR.18.metabat2.7  
**MiGA:** *Methanocella conradii* HZ254 NC 017034T (47.68% AAI)  
**GTDB-Tk:** p\_Halobacterota; c\_Methanosarcinia; o\_UBA590;  
 f\_UBA590; g\_UBA590; s\_ (75.92% AAI to GCA\_002509385.1)

AK5YR.16.maxbin2.17  
**MiGA:** *Methanocella conradii* HZ254 NC 017034T (47.20% AAI)  
**GTDB-Tk:** p\_Halobacterota; c\_Methanosarcinia; o\_UBA590;  
 f\_UBA590; g\_UBA590; s\_ (87.70% AAI to GCA\_002509385.1)

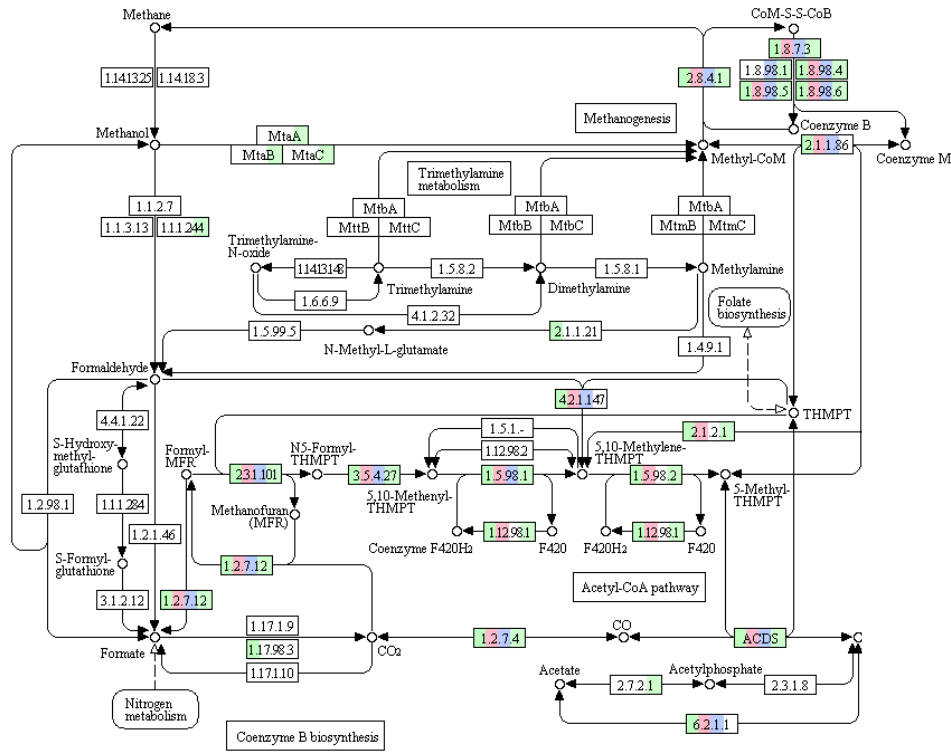

**Figure S7: Taxonomic assignment and methane generating functions of recovered archaeal MAGs.** Diagram represents partial KEGG reference pathway 'Methane metabolism' (map00680). Coloration of boxes is used to denote the presence of each function in each of the four non-redundant methanogenic MAGs (see top key). Although 13 archaeal MAGs were recovered in total, they were de-replicated into four that were non-redundant (see materials and methods for de-replication procedure). MAG taxonomic assignment was determined by using The Microbial Genomes Atlas (MiGA) webserver (<http://enve-omics.ce.gatech.edu:3000>) (Rodriguez-R et al., 2018) as well at GTDB-Tk (Parks et al., 2018). For MiGA classification, the percentage accompanying each taxonomic classification

reflects the highest AAI (average amino acid identity) with a collection of isolate genome references. AAI was also calculated between each archaeal MAG and the closest related uncultured genome based on the GTDB-Tk phylogenetic tree (see Dataset S4); the NCBI assembly IDs for each of these uncultured relative genomes are provided. GCA\_002509385.1 was derived from boreal peatland in Minnesota, USA (at 25 cm depth). GCA\_001714685.2 was derived from permafrost sediment in Miers Valley Antarctica. GCF\_002487355.1 was enriched from a mixture of freshwater sediment and anaerobic wastewater sludge in Brisbane, Australia

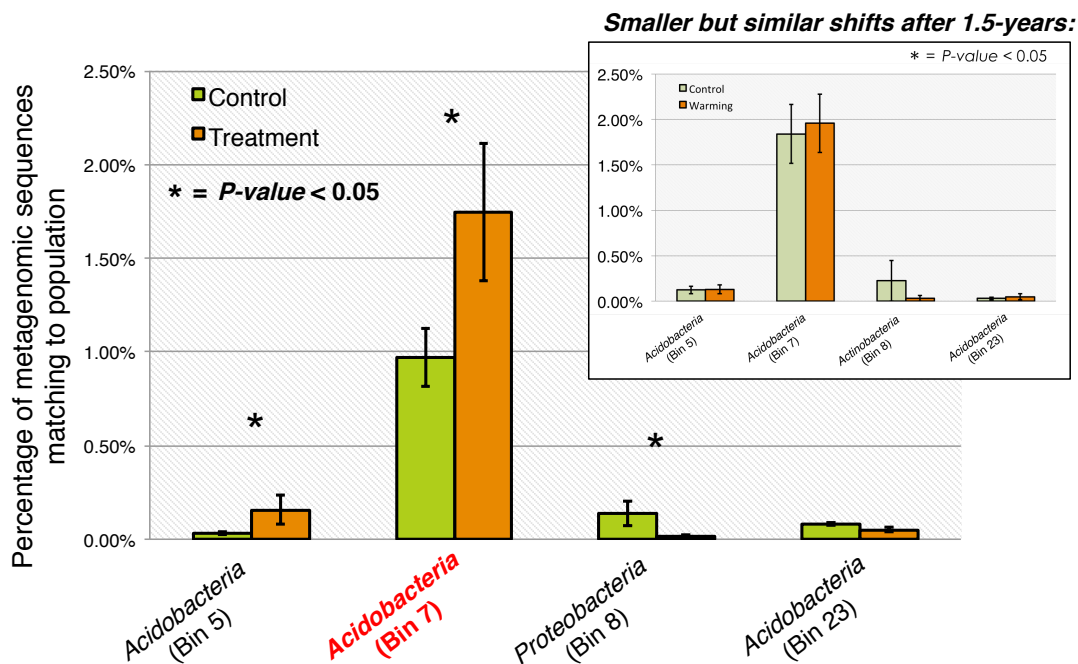

**Figure S8: Shifts in the relative abundances of dominant MAGs at 15-25 cm after 1.5 and 4.5 years of experimental warming.** MAG relative abundances were determined by dividing the number of short-reads matching each MAG at > 80 bp and > 98% nucleotide identity by the total number of reads used as query. MAG IDs reflect those assigned to MAGs

in Johnston et al., 2016. Bars reflect the mean relative abundance for each sample group (unwarmed, warmed) at 15-25 cm ( $n = 6$ ). Bars represent the standard error of the mean.

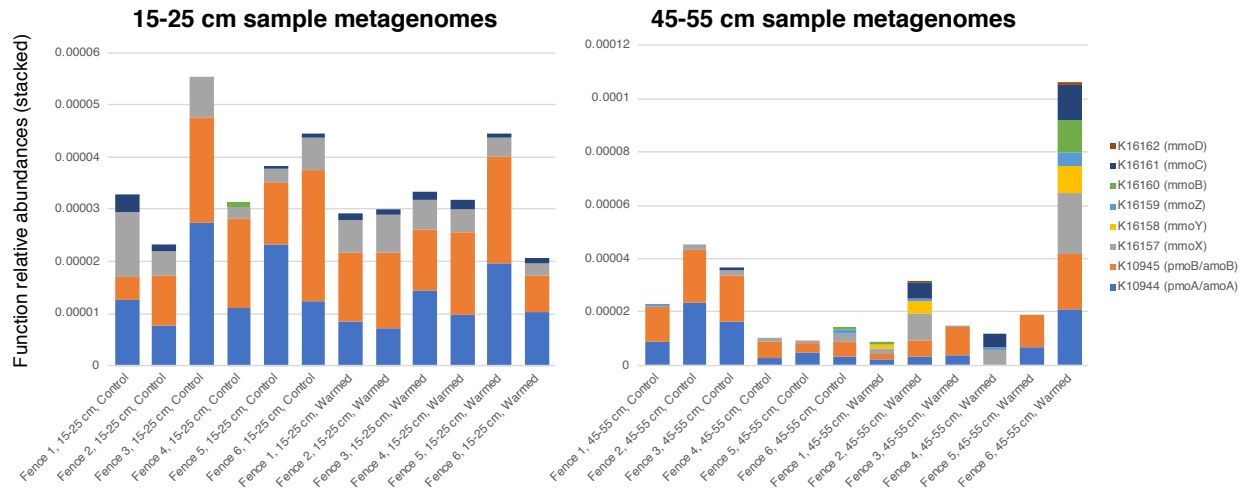

**Figure S9: Relative abundances of Kegg Orthology (KO) terms/annotations associated with aerobic methane oxidation for all twenty-four 4.5-year metagenomes.** Relative abundances were derived by normalizing the number of sequences matching to references belonging to each KO term by the total number of annotated sequences in each metagenome.
